# Supplementary material for: Development and Application of a Prophage Integrase Typing Scheme for Group B Streptococcus
Source: PubMed Central journal article supplement (PMC7487436; doi:10.3389/fmicb.2020.01993), 2020-08-31
Supplement: Data_Sheet_1.pdf [file Data_Sheet_1.pdf]

## Supplementary Material

### 1 SUPPLEMENTARY DATA

#### 1.1 Database of amino acid sequences of prophage site-specific integrases identified in this study.

GBSInt1 (same as integrase at GBS7)

MIEKYTKKDGTTAYRLRAYLGVDPMTGKQVRTTRQGFKTEREAKRAEVKLIDDFQRQGAWKSNDKTTFDDVAKLW  
FEQYRNTVKPSTFLVNQNYKYTKILKPHLGQLQMTKITVMICQKFNCLSRYSYRGLYLSLANRIFKFAVNLGIIDNNPM  
SKTLRSKCTYKNMDLTKKYTKKEELNAFLRIVEAEETLEMRLIYRLLSYGGFRIGELIALKDTDFDFRNNTISITKTA  
YTKEGWAVQSPKTKSNRTISMDAETMTLAKLYIKQSIKPLHGSFKLFNFASDTRKRLDRFILKHGLKRIPHGFRHT  
HASLLFEAGIPAKIAQERLGHAKIAITMDLYTHLSKSKSDNVADKLAELVAI

GBSInt2.1

MASRYKLDGSGWEYRIIYKDINGIRREKSKRGFSTKTLAKAAA VKAEREINSTDELLDITVLDYDYSIQWAEVYKRPHVT  
AKTWQTYSKNFKHIKHIFGNMVKVDITHTFYQKVLNEFGEIVAQQTLDFKHYQVKGALKS AVR DGIIRYNVADGAI  
VKSQVAKKSKEEFLEESDYLNLIEVSKDKIKYASYFTVYLIAVTGLRFAEVQGLTWNDVDFDNGFLDINKSFDYSIS  
QRFAPTKEQSIRKVPIDLNTIDILKEYKDNYYQPNKLGRICYGASNNATNKAIKLTTGKPYPTNHTLRHTYASYLIMQ  
GVDLISISQLLGHENLNITLKVYAHQLDKLKEKNDKVIKDIFYNL

GBSInt2.2

MAFYRKLGSWEYRITYRDSQGKKREKSKRGFKTKTLAKVAAQQAEIDLNTMTADLLDITVLDYDYNRRWADIYKPH  
ITAKTWQTYTKNFKHIEHYFGTRKLSITHTFYQQVLNDFGEKVAQQTLDFKHYQIKGACKMAIRDGIIRDNFADGAI  
VRSQKPVKEESEKFMEESEYLTFIKVAKSKVKYPSYLTYYIIAVTGLRFAEVQGLTWKIDDFDNGYIDINKTFDYSISQN  
FGPTKNEQSIRKVPIDKNSLELLRNFKSNYYQDNKLDKICFGASNNATNKVIKRV TGRNL TNHSLRHTYASYLIAQGV  
DLISVSKLLGHENLNITLKVYAHQIESLKEKNDHQVKNIFQNLKFDG

GBSInt3

MRYKTMWIEELANGKFKYIERYTDPLTNKYKKVSVTLDKNSSQAQKKAGLILQEIEDRLAIRNHSEMTY GELKKEY  
LKQWIPTVKDSTKRGYLVSDSHIATVLPDDTIINKLTKRDRLIDKLLKHNSYHVTHKCRKRLHAIFSYAIQMDYMTS  
NPTENVLVPKPKDDYKPEKVL YLTSNEVYDL CNRMIDNDEQTLADIVLFMFLTGVRYGELACLT YDKIDFENKEILIN  
ATYDFNTREITTTKTKKSTRKISVSDNILDIVNKQKKTSSFVFPNSNGVPILNAYINKRLKIYGDYHHTLFRHSHISFLAE  
KGIPLNAIMDRVGHSDPKTTLSIYSHTTVNMKEIINKQTAPFVPFLKPE

GBSInt4

MRQKSMWSEKHKSGKVN FVERYKDPYTNKWKRTSVLMEKDTPRIRKEAQRILEAKIADIVRKLQTS DMLFTNLIDEW  
WIFYQQEIKRSSIVTLKGNIREIRAEFGINIPVKNIDPRYVQNYLDNLDCSRNNKERNKSMLNLFIDYAVSLDIKDNPAR  
RAKLPKIKKTLNDWKKIEEKYLEEEEEIKRLLKELFRPSTRRLGLLSEFMSLNGCRIGE AISIEPDNIDFKNKTQLHGT  
YDRNTNGYINGEKTSPKTLASYRETIMTKREMEI IQELEFINELEKNTNPRYRDMGYIFTTRNGVPIQINSFNLALKKANE  
RLEQPINKNITSHIFRHTLVSRLAENNVPLKAIMDRVGHADAKTTVQIYTHITKKMKSNIADIMENY

GBSInt5

MKDKIITQVVSIMAEQLTMEQLEQLERVLAANLANVVMTE NVSKVDETSNPKLLHFLISAKRIEGCSEKSLKYKYMV  
IEKMAELDKPIRQISTDLRTYLAN YQKERQSSKV TIDNMRRIFSSFFSWLEDEDYILKSPVRRHKIKTDKVIKETLS  
ESLELLRDTCDNIRD LAMIDLLASTGMRVGELVRLNREDINFHERECLVFGKGN SERIVYFDARTKIHLINYLDSRKDD  
SSALFVSLAYPYDRLMIGGVETRLREIGKRANLQKVHPHKFRRTLATRAIDKGMPIEQVQHLLGHVKIDTTMHYAMV

NQANVKNSHRKYIG

GBSInt6.1

MRIESYKKKNGTTAYKFLLYAGYVDGKRKYIRRSFGFSTRQSARAALINLQAELEKPKSSMTFGMLTKQWLKEYEKT  
VQGSTYLKTERNINKHILPKLDKVTIGDINPLLVQNLTEEWCSQLKYGGKILGLVRNINLNAVRYGYISNNPALPITAPK  
IKRERKTGNNFYTLNQLKQFLELVEKTDNIEKIALFRLLAFTGIRKGEALLALTWDDLNRNTLSINKAVTRTQTGLEIDV  
TKTKSSDRLISLDDLELILQQLHETFPSSTFMFQSESGGIMTPSLPRKWLLQIIKGTDLQPQITVHGFRHTHASLLFESGL  
SLKQVQHRLGHGDLQTTMNVYTHITQSAIDDIGTKFNQFVTNKQLN

GBSInt6.2

MQIESYQKKNGTTAYRFRIYIGVIDGKKKYIKRSGFTSKKIAKQALMNLQOEIENPESKSTMLFHELTNLWLNNYEKT  
VQSSTYLKTKRNIENHILPSLGNYPKDLTPLIIQKYADEWAVKLYSSKIVGTVRNINLNAVVKFQYIPSNPSDPVTPPK  
IKRTINKKKDYINKDELKEFMQLVYDTDNIDIIATFRLLAFTGLRKGEMLALTWKDYRNGTIDVNKAIARDITGEYVG  
PTKNKSSERLISLDPETINILDELHETYPKTKYILESTAGRWISPTQPRRWLLQILSNSKSRLEPIRIHGFRTHTASLLFESGL  
LTLKQVQYRLGHEDLKTMMNTYVHITESAKDDIGTKFSQYIDF

GBSInt8

MWHEEQANGNIKFIYYKDPYTGKRQRAYVTLDRYTKQSETKARLLNEIIECRIKSSGDQFVRFQQLVEEWKTSHS  
KTVKARTMKVYRHPKIEKIDFIGDDVLVKNIDARLLQKFIDYLDKDRYSDNTINLIKQPLNMMLNYAVRMEYIMSNPM  
KNVVTPKRKKMSKKQFEDKYLETEQNQKIEQLRDPYGNHIANFSEIIFLTGMRPGELLALRWHDHDFELKIKIEYTL  
DYTTNGHANAEGLSVKNDGSYRTIDIPLRVKEMLVEELNYQNTNDRSDFVITNKGKHLSTINRRIKKTSEKLYG  
IVITSHSFRHAHITLLAELGIPLKSIMDRVGHDTVNTTIKVYTHATDKIGKQMMMDKINKFVPIQSL

GBSInt9.1

MASYRKRENGLWEYRISYKTIDGKYKRKEKGGFKTKKLAQAAAIEIEKKTQNILTNDEVTLYDFVKTWSEVYKRPY  
VKDKTWETYSKNFKHIKNYFQELKVKDITPLYYQKKNLNEFGEKYAQETLEKPHYQIKGAMKVAVREQVVFNFNFAEG  
AKVKSQVEPKNEEDFLEEREYKALLALTRENIQYVSYFTLYLLAVTGLRFSEAMGLTWSIDDFKNGILDINKSFDYS  
NTQDFADLKNESKRKVPIDSNITIDILREYKKNHWQANIKNRVCFGVSNSACNKLIKKIVGRKVRNHSRHTYASFLI  
LNGVDIVTISKLLGHESPDTLKVYTHQMEALAERNFEKIKNIFLVA

GBSInt9.2

MAYYRKRDNNGWEYRISYKDESGKFRQKSKSGFKTKKLAQAAARDIEKKSQNILTDGEVTLYDFVKTWSEVYKRPY  
VKDKTWETYTKNFRHIKTYFKDIKVKDITPLYYQKRLNEFGEKYAQETLEKPHYQIKGAMKVAVREQVIHFNFADDA  
KVKSQIESRAEENDFLEESEYKALLSLTRENIQYVSYFTLYLLSVTGLRFSEVMGLTWNVDVDFKNGILDINKAFDYSNT  
QDFCDLKNNSPERKVPIDRKTIEILYVYRQNYWQANIKNRICFGVSNSACNKLIKKIIGRPVRNHTLRHTYASFLILNGV  
DIVTISKLLGHESPDTLKVYSHQMEALAERNFEKIKNIFLAS

GBSInt10

MRKVAIYSRVSTINQAEEGYSITGQIDSLTKYCDAMGWVIYKNYS DAGYSSGKLERPAISELIEDGKNNKFDTVLVYK  
LDRLSRNVKDTLYLIKDIPTKNNIHVSIKENIDTSSAMGNLFLTLLSAIAEFEREQIKERMQFGVMNRAKSGKTTAWK  
TPPYGYTYDKENKVLNNEFEATNVKQIFNMIVAGHSIMSITNYAKEHFAGNTWTHVKIRRIENETYKGLVKYREQT  
FAGNHDAIIDEELFTKAQLALDKRTNSQNNTRPFQGGKYMMLSHIAKCGYCGAPLKVCTGRPRVDGTRRQTYVCVNKT  
ESGAKRGVNNYNNNKVCNSGRYEKSCVEKYVINELSKIQHDKEYLEKMKNNSKKVDVSSLKKEIKSIDKKNRLNDL  
YVNDFISLSKLTTEEIKLNKLKEGYHKTIKLNYVENKNEDVISTLVNNIDISKSSYDVQSRIVKQLVDRVEVTTDNIDIIF  
NF

## GBSInt11.1

MNKVAIYVRVSTTMQAEEGYSIDEQIDKLSYCKIKDWTVYDIYKDGGSFGNIERPAMERLISDAKRKKFDTVLVY  
 KLDRLSRSQKDTLFLIEEVDKNDISFLSLNESFDTSTAFGKAMIGILSVFAQLEREQIKERMMLGKIGRAKTGKSMMS  
 KVSFGYTYDKLDELVVNQAESIIVRKIFDAYLGGLSLNKLRDYLNNNGIYRGDKPWNVYQGLRRILSNPVYIGMIRYR  
 EEIYPGNHKAIIDIDDYNTQEEIKKRQIKALEFSNNPRPFRSKYMLSGIAKCGYCGTPLQIILGSKRKDGTRNMRYQCI  
 NRPFRNTKGVTIYNDGKKCESGFYEKADIEEFVINEIRSLQINYNKLDAMFDRHPTVNSDDIKKQIITLDNKLKRLNDL  
 YINMIELDDLKKQTQSLRKQKTILEDELNNPAITQEKNNKHFKEMLATKDITKLDYETQKNIVNNLINKVFKSGY  
 IKIEWKIPFKKA

## GBSInt11.2

MITTNKVAIYVRVSTTNQAEEGYSIEEQKDKLSYCNIKDWNVFNVTYTDGGFSGSNTERPALEQLIKDAKKKKFDTV  
 LVYKLDRLSRSQKDTLYLIEDIFLENNIDFVSLLENFDTSTPFGKAMVIGILSVFAQLEREQIKERMQLGKLGRAKAGKS  
 MMWAKVAYGYTYHKSGEMTINELEAIVVREIFNSYLEGMSITKLRDKINDTYPKTPAWSYRIIRQILDNPVYCGYN  
 QYKGEVYKGNHEPIISEEDFNKTQDELKIRQRTAAEFNPRPFQAKYMLSGIAQCGYCKAPLKIIMGAVRKDGTRFIK  
 YECYQRHPRTRGVTTYNQKCHSSSYKQDVEDYVLREISKLQNDKKAIDELFENTNMDTIDRESIKKQIEAISSKI  
 KRLNDLYIDDRITIDELRKKSTEFLLSKTFLKEKLENDPILKQESKDNKILSCDDILTMDYDQKQIIVKGLINKVQVT  
 ADKVIKWKI

## GBSInt11.3

MYIEELDDGKYKFIERYIDPLTGKKKRTSVTLDRKTKQAENKARSILQNRISKKINNVTKVELTYGELRQEYLKQWLP  
 TVKNNTIKNTRYDEYISYLLDDDLISNITKATIRNIANELGDKKSYNVVSKCMKRLSAILNYAASLDYIQSNPAKSV  
 KVIKPVENYDADEKIEFLTIDEMRELYVQMTSKSNKIRDLVVFMTLGMRYGEVVALTTDKIDFENKTIKINATYDYD  
 GKELTTPKTENSVRVISVSDSILSIVNDFIVHNRMNLLITDHIFVSRYGPNMSIRYVNRKLDKDFMPEKQLKTHVFRSH  
 ISYLAEKNVPLKAIMDRVGHKNAETTLKIYTHTTNNMKEYINGQTNINF

## GBSInt12

MKYTKTKYPNIYFYETAKGKRYVRRSFFFQGGKKEITKSGLSTIPQARAALTEIERQINEQELGINTQLTVDQYWEIF  
 SAKRLSTGRWHESYLYDSMYRNHIKDEFQVFKLKNLDRNGYEVFIAEKLKHKHTRHTVHTINSSMAILNDAVKNG  
 NLAGNRLKGVYIGESAIPANNKITLEQFKEWMDKAKEIMPKKFYALTYMTIFGLRRGEVFLRPMDEVTKNEHGRA  
 VLKLDKSRNRTLNGKSLKTKDSERYVCLDDVGTDYIDYLIDEADRIKRSGLIIEQKQKDYLSINEKGLLINPNQMNK  
 HFGLVSEAIGHVTPHMMRHFFTTQSIIAGVPMEQLSQALGHTKIYMTDRYNQVEDELAETDMFLTRIR

## 1.2 Database of amino acid sequences of putative phage inducible-chromosomal islands (PICl) site-specific integrases identified in this study.

## PIC1Int

MERFMIMKITEVKKKDGTVIYRASIYLGTDKVTGKKVTTKITGRTKKEVREKAKQEAIEFIKNGSTRFKATSITSYQEL  
 ATLWWDYSYKHTVKYNTQLATEKLLTVHVIPIFGAYKLDKLTTPLIQSIINKLADKTNKGERKAYLHYDRIHALNKRIL  
 QYGVIMQAIPFPAREVILPRNTKKANTKRVKHFENDELRTFFNYLNNLDKNKYRYFYEVTLKFLLATGCRINEALA  
 LNWSIDLDNAVVHITKTLNYKQEINSPKSKSSYRDIDIDSRTVTMLKQYRRRQIQEAWKLRSETVVFSDFIHKYPN  
 NRTLQTRLRTHFKRANVSNIGFHGFRHTHASLLLNTGIPYKELQYRLGHSTLSMTMDIYSHLSKENAKKAVSFFETA  
 INSI

## PIC2Int

MERFMIMKITEVKKKNGATVYRASIYLGVDQVTGKKVKPKVTGRTHKEVKQKANQEIAFQKDGYTRFKATSIASY  
 QELSNLWWEYSYKHTVKPNTQDNVKKLLDNHVIPLFGVYKLDKLTTPLIQSIVNKLADKTNKGEPGAYLHYDKIHALN  
 KRILQYGVTMQAISSNPARDVVLPRNTQKAKRKKVKHFENQDLKKFLDYLGGDLDSKYRNLYEATLYKFLLATGCR  
 INEALALSWSIDLENATISITKTLNHLGQINSPKSKAIYRDIDIDQATITMLKAYQLRQIQEAWKLRGRTETVVFSDFIHD

YPNNKTLGTRLKTRFKRAGVPNIGFHGFRHTHASLLNSGIPYKELQYRLGHSTLSMTMDIYSHLSKENAKKAVSFYE  
TALKAL

### 1.3 Phage inducible-chromosomal islands (PICl) manual detection method

1. Genomes were freshly annotated using Prokka v1.13.1.
2. Manual searches were performed with a text editor for genes annotated as “site-specific integrase”, “integrase” or “recombinase”.
3. For every genome, after the identification of integrases, manual recognition of the genes at the 5’ end and upstream was performed. This was done keeping in mind the basic structure of phage inducible-chromosomal islands (PICl):

#### Module A (genes oriented as the integrase)

- It starts with the **integrase** gene (which could also be annotated as site-specific integrase); there could be a few genes, in variable number and with various functions, oriented in the same direction of the integrase before the next element;
- The next gene that is always present is named *stl*; it is a **transcriptional regulator** and it is oriented in the same direction as the integrase (it could be annotated as HTH-domain family protein or DNA-binding protein);

#### Module B (genes oriented opposite to the integrase)

- The next gene that is always present is named *str*; it is a **transcriptional regulator** and it is oriented in the opposite direction compared to the integrase (it could be annotated as HTH-domain family protein or DNA-binding protein);
- The number of genes that can be found from here onward is variable and they can have different functions; usually there are a few **replication genes** (e.g. a DNA primase); they are all oriented in the opposite direction compared to the integrase;
- Sometimes, after the replication genes, genes annotated as **packaging genes** can be present;
- **Toxin genes** can be found in different parts of the element, usually towards the end.

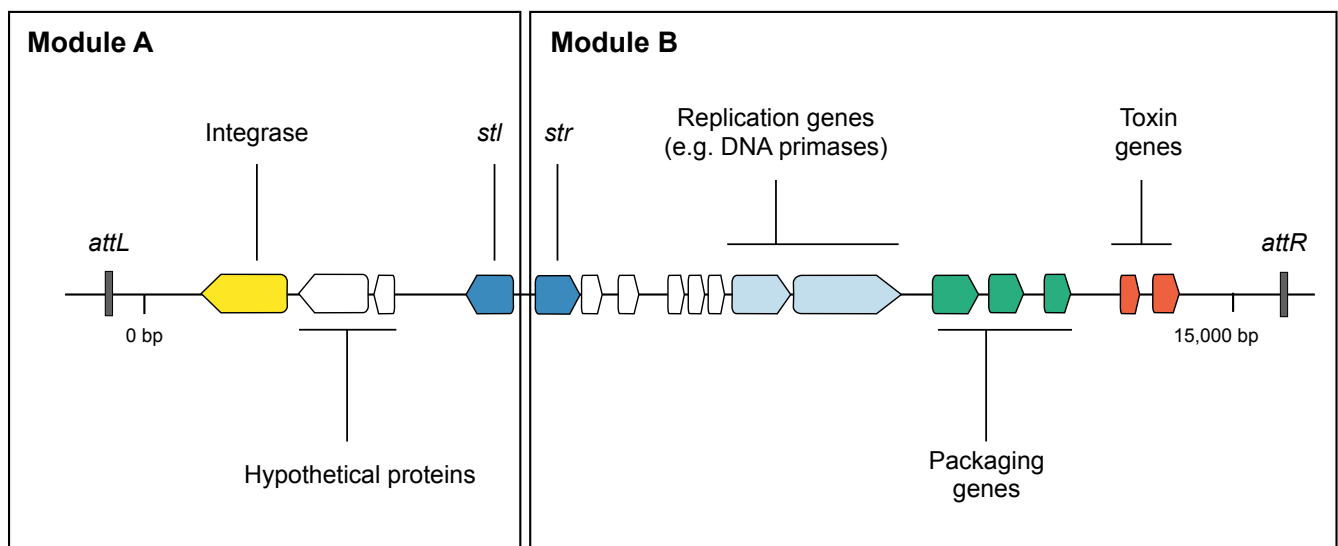

## 2 SUPPLEMENTARY TABLES AND FIGURES

Table S1: List of 69 Group B *Streptococcus* (GBS) genomes downloaded from NCBI included in dataset 1. Accession numbers, isolate names, host species, country of origin, sequence type (ST) and serotype are shown.

| ACCESSION/RUN | ISOLATE | HOST | COUNTRY | ST         | SEROTYPE |
|---------------|---------|------|---------|------------|----------|
| CP007482.1    | 138P    | fish | USA     | ST261      | -        |
| CP007565.1    | 138spar | fish | USA     | ST261      | -        |
| CP011328.1    | GX026   | fish | China   | ST261      | -        |
| CP015976.1    | S25     | fish | Brazil  | ST552      | -        |
| CP018623.1    | S13     | fish | Brazil  | ST552      | -        |
| CP019800.1    | SA30    | fish | Brazil  | ST552      | Ib       |
| CP019801.1    | SA33    | fish | Brazil  | ST552      | Ib       |
| CP019802.1    | SA53    | fish | Brazil  | ST260      | Ib       |
| CP019803.1    | SA73    | fish | Brazil  | ST260      | Ib       |
| CP019804.1    | SA1     | fish | Brazil  | ST552      | Ib       |
| CP019805.1    | SA5     | fish | Brazil  | ST552      | Ib       |
| CP019806.1    | SA9     | fish | Brazil  | ST552      | Ib       |
| CP019807.1    | SA16    | fish | Brazil  | ST552      | Ib       |
| CP019808.1    | SA75    | fish | Brazil  | ST260      | Ib       |
| CP019809.1    | SA79    | fish | Brazil  | ST552      | Ib       |
| CP019810.1    | SA81    | fish | Brazil  | ST552      | Ib       |
| CP019811.1    | SA85    | fish | Brazil  | ST927      | Ib       |
| CP019812.1    | SA95    | fish | Brazil  | ST927      | Ib       |
| CP019813.1    | SA97    | fish | Brazil  | ST927      | Ib       |
| CP019814.1    | SA102   | fish | Brazil  | ST927      | Ib       |
| CP019815.1    | SA132   | fish | Brazil  | ST260      | Ib       |
| CP019816.1    | SA136   | fish | Brazil  | ST260      | Ib       |
| CP019817.1    | SA159   | fish | Brazil  | Unknown ST | Ib       |
| CP019818.1    | SA184   | fish | Brazil  | ST552      | Ib       |
| CP019819.1    | SA191   | fish | Brazil  | ST260      | Ib       |
| CP019820.1    | SA195   | fish | Brazil  | ST552      | Ib       |
| CP019821.1    | SA201   | fish | Brazil  | ST552      | Ib       |
| CP019822.1    | SA209   | fish | Brazil  | ST552      | Ib       |
| CP019823.1    | SA212   | fish | Brazil  | ST552      | Ib       |
| CP019824.1    | SA218   | fish | Brazil  | ST927      | Ib       |
| CP019825.1    | SA220   | fish | Brazil  | ST552      | Ib       |
| CP019826.1    | SA245   | fish | Brazil  | ST260      | Ib       |
| CP019827.1    | SA256   | fish | Brazil  | ST260      | Ib       |
| CP019828.1    | SA289   | fish | Brazil  | ST260      | Ib       |
| CP019829.1    | SA330   | fish | Brazil  | ST552      | Ib       |
| CP019830.1    | SA333   | fish | Brazil  | ST552      | Ib       |
| CP019831.1    | SA341   | fish | Brazil  | ST552      | Ib       |
| CP019832.1    | SA343   | fish | Brazil  | ST552      | Ib       |

Table S1 continued from previous page

| ACCESSION/RUN | ISOLATE       | HOST   | COUNTRY   | ST    | SEROTYPE |
|---------------|---------------|--------|-----------|-------|----------|
| CP019833.1    | SA346         | fish   | Brazil    | ST552 | Ib       |
| CP019834.1    | SA374         | fish   | Brazil    | ST552 | Ib       |
| CP019835.1    | SA375         | fish   | Brazil    | ST552 | Ib       |
| CP019836.1    | SA623         | fish   | Brazil    | ST552 | Ib       |
| CP019837.1    | SA627         | fish   | Brazil    | ST552 | Ib       |
| CP025026.1    | SGEHI2015-113 | fish   | Singapore | ST283 | -        |
| CP025027.1    | SGEHI2015-107 | fish   | Singapore | ST283 | -        |
| CP025028.1    | SGEHI2015-95  | fish   | Singapore | ST283 | -        |
| CP025029.1    | SGEHI2015-25  | fish   | Singapore | ST283 | -        |
| FO393392.1    | 2-22          | fish   | Israel    | ST261 | Ib       |
| HF952106.1    | ILRI112       | camel  | Kenya     | ST617 | -        |
| NZ_CP008813.1 | C001          | bovine | China     | ST103 | III      |
| NZ_CP012503.1 | NGBS357       | human  | Canada    | ST297 | -        |
| NZ_CP013908.1 | GBS-M002      | human  | Taiwan    | ST1   | -        |
| NZ_CP016391.1 | FWL1402       | frog   | China     | ST739 | -        |
| NZ_CP016501.1 | WC1535        | fish   | China     | ST7   | -        |
| NZ_CP019978.1 | Sag37         | human  | China     | ST12  | -        |
| NZ_CP019979.1 | Sag158        | human  | China     | ST19  | -        |
| NZ_CP020449.1 | FDAARGOS_254  | -      | -         | ST22  | -        |
| NZ_CP021862.1 | CUGBS591      | human  | Hong Kong | ST12  | -        |
| NZ_CP021863.1 | SG-M163       | human  | Singapore | ST283 | -        |
| NZ_CP021864.1 | SG-M158       | human  | Singapore | ST283 | -        |
| NZ_CP021865.1 | SG-M50        | human  | Singapore | ST283 | -        |
| NZ_CP021866.1 | SG-M29        | human  | Singapore | ST283 | -        |
| NZ_CP021867.1 | SG-M25        | human  | Singapore | ST19  | -        |
| NZ_CP021868.1 | SG-M8         | human  | Singapore | ST1   | -        |
| NZ_CP021869.1 | SG-M6         | human  | Singapore | ST17  | -        |
| NZ_CP021870.1 | SG-M4         | human  | Singapore | ST23  | -        |
| NZ_CP022537.1 | 874391        | human  | Japan     | ST17  | III      |
| NZ_LT545678.1 | SA111         | bovine | Portugal  | ST61  | -        |
| NZ_LT714196.1 | BM110         | human  | USA       | ST17  | -        |

Table S2: List of 503 Group B *Streptococcus* (GBS) genomes included in dataset 2 (Richards et al., 2019). Accession numbers, isolate names, host species, country of origin, sequence type (ST) with single locus variants (SLV) and serotype are shown.

| ACCESSION/RUN | ISOLATE    | HOST   | COUNTRY | ST    | SEROTYPE |
|---------------|------------|--------|---------|-------|----------|
| AE009948      | 2603V/R    | human  | Italy   | ST110 | V        |
| AEXT0100      | FSL_S3-026 | bovine | USA     | ST67  | III      |
| AL732656      | NEM316     | human  | -       | ST23  | III      |

Table S2 continued from previous page

| ACCESSION/RUN | ISOLATE      | HOST  | COUNTRY   | ST     | SEROTYPE |
|---------------|--------------|-------|-----------|--------|----------|
| ALQP0100      | CCUG_37738   | human | Sweden    | ST19   | III      |
| BCNJ0100      | JP17         | fish  | Thailand  | ST283  | III      |
| CP000114      | A909         | human | USA       | ST7    | Ia       |
| CP003810      | GD201008-001 | fish  | China     | ST7    | Ia       |
| CP003919      | SA20         | fish  | Brazil    | SLV257 | Ib       |
| CP006910      | CNCTC 10/84  | human | USA       | ST26   | V        |
| CP007570      | GBS1-NY      | human | USA       | ST22   | II       |
| CP007571      | GBS2-NM      | human | USA       | ST22   | II       |
| CP007572      | GBS6         | human | USA       | ST22   | II       |
| CP007631      | NGBS061      | human | Canada    | ST459  | IV       |
| CP007632      | NGBS572      | human | Canada    | ST452  | IV       |
| CP010319      | GBS85147     | human | Brazil    | ST103  | Ia       |
| CP010867      | SS1          | human | USA       | ST1    | V        |
| CP010874      | CU_GBS_08    | human | Hong Kong | ST283  | III      |
| CP010875      | CU_GBS_98    | human | Hong Kong | ST283  | III      |
| CP011325      | HN016        | fish  | China     | ST7    | Ia       |
| CP011326      | YM001        | fish  | China     | ST7    | Ia       |
| CP011327      | GX064        | fish  | China     | ST7    | Ia       |
| CP011329      | H002         | human | China     | SLV736 | III      |
| CP012419      | SG-M1        | human | Singapore | ST283  | III      |
| CP012480      | NGBS128      | human | Canada    | ST17   | III      |
| CP013202      | GBS ST1      | dog   | USA       | ST1    | V        |
| ERR048526     | BE-NI-001    | human | Belgium   | ST23   | Ia       |
| ERR048527     | BE-NI-005    | human | Belgium   | ST8    | Ib       |
| ERR048528     | BE-NI-007    | human | Belgium   | ST315  | III      |
| ERR048529     | BE-NI-008    | human | Belgium   | ST10   | V        |
| ERR048530     | DK-NI-001    | human | Denmark   | ST17   | III      |
| ERR048531     | DK-NI-002    | human | Denmark   | ST23   | V        |
| ERR048532     | DK-NI-003    | human | Denmark   | ST523  | Ib       |
| ERR048534     | DK-NI-005    | human | Denmark   | ST23   | Ia       |
| ERR048535     | DK-NI-007    | human | Denmark   | ST17   | III      |
| ERR048536     | DK-NI-008    | human | Denmark   | ST9    | Ib       |
| ERR048537     | DK-NI-009    | human | Denmark   | ST28   | II       |
| ERR048538     | DK-NI-010    | human | Denmark   | ST19   | III      |
| ERR048539     | DK-NI-011    | human | Denmark   | ST19   | III      |
| ERR048540     | DK-NI-012    | human | Denmark   | SLV1   | V        |
| ERR048541     | DK-NI-013    | human | Denmark   | ST1    | V        |
| ERR048542     | DK-NI-014    | human | Denmark   | ST88   | Ia       |
| ERR048543     | DK-NI-015    | human | Denmark   | ST10   | V        |
| ERR048546     | DK-NI-021    | human | Denmark   | ST17   | III      |
| ERR048547     | DK-NI-022    | human | Denmark   | SLV1   | V        |
| ERR048548     | BG-NI-001    | human | Bulgaria  | ST144  | Ia       |
| ERR048549     | BG-NI-002    | human | Bulgaria  | ST17   | III      |



Table S2 continued from previous page

| ACCESSION/RUN | ISOLATE    | HOST  | COUNTRY        | ST    | SEROTYPE |
|---------------|------------|-------|----------------|-------|----------|
| ERR048550     | BG-NI-003  | human | Bulgaria       | ST8   | Ib       |
| ERR048551     | BG-NI-004  | human | Bulgaria       | ST23  | Ia       |
| ERR048552     | BG-NI-005  | human | Bulgaria       | ST23  | Ia       |
| ERR048553     | BG-NI-006  | human | Bulgaria       | ST12  | Ib       |
| ERR048554     | BG-NI-007  | human | Bulgaria       | ST12  | Ib       |
| ERR048555     | BG-NI-009  | human | Bulgaria       | ST28  | II       |
| ERR048556     | BG-NI-010  | human | Bulgaria       | ST12  | II       |
| ERR048557     | BG-NI-011  | human | Bulgaria       | SLV1  | V        |
| ERR048561     | DE-NI-001  | human | Germany        | SLV1  | V        |
| ERR048562     | DE-NI-003  | human | Germany        | ST10  | V        |
| ERR048563     | DE-NI-004  | human | Germany        | ST10  | V        |
| ERR048564     | DE-NI-006  | human | Germany        | ST144 | Ia       |
| ERR048567     | DE-NI-012  | human | Germany        | ST88  | Ia       |
| ERR048568     | DE-NI-0013 | human | Germany        | ST17  | III      |
| ERR048569     | DE-NI-014  | human | Germany        | ST23  | Ia       |
| ERR048570     | DE-NI-0017 | human | Germany        | SLV17 | III      |
| ERR048571     | DE-NI-0019 | human | Germany        | ST17  | III      |
| ERR048572     | DE-NI-022  | human | Germany        | ST387 | V        |
| ERR048573     | DE-NI-032  | human | Germany        | ST17  | III      |
| ERR048574     | DE-NI-033  | human | Germany        | ST23  | Ia       |
| ERR048575     | DE-NI-036  | human | Germany        | SLV17 | III      |
| ERR048576     | DE-NI-037  | human | Germany        | ST17  | III      |
| ERR048577     | DE-NI-040  | human | Germany        | ST23  | Ia       |
| ERR048579     | DE-NI-042  | human | Germany        | ST19  | III      |
| ERR048581     | IT-NI-007  | human | Italy          | ST17  | III      |
| ERR048582     | IT-NI-008  | human | Italy          | ST17  | III      |
| ERR048583     | IT-NI-009  | human | Italy          | ST17  | III      |
| ERR048584     | IT-NI-016  | human | Italy          | ST130 | IX       |
| ERR048586     | IT-NI-019  | human | Italy          | ST467 | III      |
| ERR048587     | IT-NI-020  | human | Italy          | SLV17 | III      |
| ERR048588     | IT-NI-028  | human | Italy          | ST1   | V        |
| ERR048589     | IT-NI-0031 | human | Italy          | SLV1  | V        |
| ERR048591     | IT-NI-033  | human | Italy          | ST17  | III      |
| ERR048592     | IT-NI-034  | human | Italy          | ST17  | III      |
| ERR048594     | IT-NI-037  | human | Italy          | ST26  | V        |
| ERR048595     | CZ-NI-001  | human | Czech Republic | ST23  | Ia       |
| ERR048596     | CZ-NI-002  | human | Czech Republic | ST19  | III      |
| ERR048597     | CZ-NI-003  | human | Czech Republic | ST19  | III      |
| ERR048598     | CZ-NI-004  | human | Czech Republic | SLV1  | V        |
| ERR048599     | CZ-NI-005  | human | Czech Republic | ST23  | Ia       |
| ERR048600     | CZ-NI-006  | human | Czech Republic | ST1   | V        |
| ERR048601     | CZ-NI-007  | human | Czech Republic | ST255 | Ib       |
| ERR048602     | CZ-NI-008  | human | Czech Republic | ST1   | V        |

Table S2 continued from previous page

| ACCESSION/RUN | ISOLATE     | HOST   | COUNTRY        | ST    | SEROTYPE |
|---------------|-------------|--------|----------------|-------|----------|
| ERR048603     | CZ-NI-009   | human  | Czech Republic | ST1   | V        |
| ERR048605     | CZ-NI-013   | human  | Czech Republic | ST1   | V        |
| ERR048606     | CZ-NI-014   | human  | Czech Republic | ST479 | II       |
| ERR048607     | CZ-NI-015   | human  | Czech Republic | ST1   | V        |
| ERR048608     | CZ-NI-016   | human  | Czech Republic | ST459 | IV       |
| ERR048611     | GB-NI-003   | human  | United Kingdom | ST17  | III      |
| ERR048612     | GB-NI-004   | human  | United Kingdom | ST17  | III      |
| ERR048613     | GB-NI-005   | human  | United Kingdom | SLV17 | III      |
| ERR048614     | GB-NI-006   | human  | United Kingdom | ST23  | Ia       |
| ERR048615     | GB-NI-007   | human  | United Kingdom | ST19  | III      |
| ERR048616     | GB-NI-009   | human  | United Kingdom | ST1   | V        |
| ERR048617     | GB-NI-010   | human  | United Kingdom | ST1   | V        |
| ERR048618     | GB-NI-011   | human  | United Kingdom | ST19  | III      |
| ERR054970     | B09PS       | human  | Australia      | ST1   | V        |
| ERR054971     | B15VD       | human  | Australia      | ST17  | III      |
| ERR054972     | B24VD       | human  | Australia      | ST28  | II       |
| ERR054973     | B37VS       | human  | Australia      | ST335 | III      |
| ERR054974     | B42VD       | human  | Australia      | ST23  | III      |
| ERR054975     | B50VD       | human  | Australia      | ST23  | Ia       |
| ERR054976     | B68VD       | human  | Australia      | SLV19 | III      |
| ERR054982     | RBH02       | human  | Australia      | ST2   | IV       |
| ERR054983     | RBH03       | human  | Australia      | ST19  | III      |
| ERR054985     | RBH05       | human  | Australia      | ST1   | V        |
| ERR054987     | RBH07       | human  | Australia      | ST23  | Ia       |
| ERR054988     | RBH08       | human  | Australia      | ST23  | Ia       |
| ERR054990     | RBH11       | human  | Australia      | ST19  | III      |
| ERR054992     | B96P        | human  | Australia      | ST17  | III      |
| ERR054993     | B41VS       | human  | Australia      | ST652 | II       |
| ERR054994     | B50VS       | human  | Australia      | ST23  | Ia       |
| ERR054997     | B96V        | human  | Australia      | ST17  | III      |
| ERR829829     | MRI Z1-116  | bovine | Denmark        | ST604 | Ib       |
| ERR829883     | MRI Z2-084  | human  | Finland        | ST28  | II       |
| HF952104      | 09mas018883 | bovine | Sweden         | ST1   | V        |
| HF952105      | ILRI005     | camel  | Kenya          | ST609 | V        |
| HG939456      | COH1        | human  | USA            | ST17  | III      |
| JPOV0100      | NGS-ED-1000 | human  | United Kingdom | ST7   | Ia       |
| SRR1213207    | NGBS024     | human  | Canada         | ST459 | IV       |
| SRR1213208    | NGBS046     | human  | Canada         | ST459 | IV       |
| SRR1213210    | NGBS058     | human  | Canada         | ST459 | IV       |
| SRR1213213    | NGBS070     | human  | Canada         | ST459 | IV       |
| SRR1213214    | NGBS100     | human  | Canada         | ST452 | IV       |
| SRR1213215    | NGBS122     | human  | Canada         | ST452 | IV       |
| SRR1213216    | NGBS146     | human  | Canada         | ST459 | IV       |

Table S2 continued from previous page

| <b>ACCESSION/RUN</b> | <b>ISOLATE</b> | <b>HOST</b> | <b>COUNTRY</b> | <b>ST</b> | <b>SEROTYPE</b> |
|----------------------|----------------|-------------|----------------|-----------|-----------------|
| SRR1213217           | NGBS151        | human       | Canada         | ST3       | IV              |
| SRR1213218           | NGBS187        | human       | Canada         | ST452     | IV              |
| SRR1213219           | NGBS191        | human       | Canada         | ST459     | IV              |
| SRR1213220           | NGBS197        | human       | Canada         | ST452     | IV              |
| SRR1213221           | NGBS199        | human       | Canada         | ST459     | IV              |
| SRR1213223           | NGBS290        | human       | Canada         | ST459     | IV              |
| SRR1213224           | NGBS314        | human       | Canada         | ST452     | IV              |
| SRR1213226           | NGBS379        | human       | Canada         | ST3       | IV              |
| SRR1213227           | NGBS400        | human       | Canada         | SLV459    | IV              |
| SRR1213228           | NGBS410        | human       | Canada         | ST459     | IV              |
| SRR1213229           | NGBS447        | human       | Canada         | ST196     | IV              |
| SRR1213230           | NGBS472        | human       | Canada         | SLV196    | IV              |
| SRR1213231           | NGBS493        | human       | Canada         | ST459     | IV              |
| SRR1213232           | NGBS507        | human       | Canada         | ST459     | IV              |
| SRR1213233           | NGBS521        | human       | Canada         | ST459     | IV              |
| SRR1213234           | NGBS525        | human       | Canada         | ST459     | IV              |
| SRR1213235           | NGBS528        | human       | Canada         | ST459     | IV              |
| SRR1213236           | NGBS556        | human       | Canada         | ST452     | IV              |
| SRR1213238           | NGBS572        | human       | Canada         | ST452     | IV              |
| SRR1213239           | NGBS588        | human       | Canada         | ST682     | IV              |
| SRR1213240           | NGBS597        | human       | Canada         | ST452     | IV              |
| SRR1213241           | NGBS598        | human       | Canada         | ST452     | IV              |
| SRR1213242           | NGBS612        | human       | Canada         | ST452     | IV              |
| SRR1213243           | NGBS615        | human       | Canada         | ST459     | IV              |
| SRR1790740           | NGBS010        | human       | Canada         | ST1       | V               |
| SRR1790741           | NGBS107        | human       | Canada         | ST1       | V               |
| SRR1790742           | NGBS110        | human       | Canada         | ST1       | V               |
| SRR1790743           | NGBS117        | human       | Canada         | ST1       | V               |
| SRR1790749           | NGBS180        | human       | Canada         | ST1       | V               |
| SRR1790751           | NGBS021        | human       | Canada         | ST1       | V               |
| SRR1790752           | NGBS210        | human       | Canada         | ST1       | V               |
| SRR1790753           | NGBS022        | human       | Canada         | ST1       | V               |
| SRR1790758           | NGBS246        | human       | Canada         | ST1       | V               |
| SRR1790759           | NGBS025        | human       | Canada         | ST1       | V               |
| SRR1790760           | NGBS267        | human       | Canada         | ST1       | V               |
| SRR1790761           | NGBS272        | human       | Canada         | ST1       | V               |
| SRR1790765           | NGBS028        | human       | Canada         | ST1       | V               |
| SRR1790766           | NGBS283        | human       | Canada         | ST1       | V               |
| SRR1790767           | NGBS287        | human       | Canada         | ST1       | V               |
| SRR1790768           | NGBS288        | human       | Canada         | ST1       | V               |
| SRR1790769           | NGBS298        | human       | Canada         | ST1       | V               |
| SRR1790770           | NGBS030        | human       | Canada         | ST1       | V               |
| SRR1790771           | NGBS303        | human       | Canada         | ST1       | V               |

Table S2 continued from previous page

| ACCESSION/RUN | ISOLATE | HOST  | COUNTRY | ST    | SEROTYPE |
|---------------|---------|-------|---------|-------|----------|
| SRR1790773    | NGBS323 | human | Canada  | ST1   | V        |
| SRR1790775    | NGBS330 | human | Canada  | ST1   | V        |
| SRR1790779    | NGBS348 | human | Canada  | ST1   | V        |
| SRR1790780    | NGBS035 | human | Canada  | ST1   | V        |
| SRR1790782    | NGBS359 | human | Canada  | ST1   | V        |
| SRR1790783    | NGBS360 | human | Canada  | ST1   | V        |
| SRR1790785    | NGBS380 | human | Canada  | ST1   | V        |
| SRR1790786    | NGBS381 | human | Canada  | ST1   | V        |
| SRR1790788    | NGBS418 | human | Canada  | ST1   | V        |
| SRR1790789    | NGBS425 | human | Canada  | ST1   | V        |
| SRR1790790    | NGBS434 | human | Canada  | ST1   | V        |
| SRR1790792    | NGBS444 | human | Canada  | ST1   | V        |
| SRR1790793    | NGBS462 | human | Canada  | ST1   | V        |
| SRR1790794    | NGBS492 | human | Canada  | ST1   | V        |
| SRR1790795    | NGBS494 | human | Canada  | ST1   | V        |
| SRR1790796    | NGBS497 | human | Canada  | ST1   | V        |
| SRR1790797    | NGBS499 | human | Canada  | ST1   | V        |
| SRR1790799    | NGBS519 | human | Canada  | ST1   | V        |
| SRR1790800    | NGBS536 | human | Canada  | ST1   | V        |
| SRR1790801    | NGBS054 | human | Canada  | ST1   | V        |
| SRR1790802    | NGBS553 | human | Canada  | ST1   | V        |
| SRR1790803    | NGBS558 | human | Canada  | ST1   | V        |
| SRR1790805    | NGBS571 | human | Canada  | SLV1  | V        |
| SRR1790806    | NGBS579 | human | Canada  | ST1   | V        |
| SRR1790807    | NGBS580 | human | Canada  | ST1   | V        |
| SRR1790808    | NGBS586 | human | Canada  | ST1   | V        |
| SRR1790809    | NGBS604 | human | Canada  | ST1   | V        |
| SRR1790811    | NGBS063 | human | Canada  | ST1   | V        |
| SRR1790812    | NGBS630 | human | Canada  | ST1   | V        |
| SRR1790814    | NGBS068 | human | Canada  | ST1   | V        |
| SRR1790815    | NGBS008 | human | Canada  | ST1   | V        |
| SRR1790816    | NGBS009 | human | Canada  | ST1   | V        |
| SRR1790817    | NGBS092 | human | Canada  | ST1   | V        |
| SRR1790819    | NGBS094 | human | Canada  | ST1   | V        |
| SRR1790820    | NGBS099 | human | Canada  | ST1   | V        |
| SRR2062051    | NGBS680 | human | Canada  | ST459 | IV       |
| SRR2062052    | NGBS686 | human | Canada  | ST459 | IV       |
| SRR2062054    | NGBS762 | human | Canada  | ST459 | IV       |
| SRR2062055    | NGBS767 | human | Canada  | ST459 | IV       |
| SRR2062056    | NGBS768 | human | Canada  | ST452 | IV       |
| SRR2062057    | NGBS783 | human | Canada  | ST459 | IV       |
| SRR2062058    | NGBS788 | human | Canada  | ST459 | IV       |
| SRR2062059    | NGBS789 | human | Canada  | ST459 | IV       |

Table S2 continued from previous page

| <b>ACCESSION/RUN</b> | <b>ISOLATE</b> | <b>HOST</b> | <b>COUNTRY</b> | <b>ST</b> | <b>SEROTYPE</b> |
|----------------------|----------------|-------------|----------------|-----------|-----------------|
| SRR2062060           | NGBS791        | human       | Canada         | ST459     | IV              |
| SRR2062063           | NGBS795        | human       | Canada         | ST459     | IV              |
| SRR2062064           | NGBS798        | human       | Canada         | ST710     | IV              |
| SRR2062065           | NGBS800        | human       | Canada         | ST459     | IV              |
| SRR2062066           | NGBS698e       | human       | Canada         | ST459     | IV              |
| SRR2062068           | NGBS801        | human       | Canada         | ST459     | IV              |
| SRR2062069           | NGBS806        | human       | Canada         | ST459     | IV              |
| SRR2062071           | NGBS808        | human       | Canada         | ST459     | IV              |
| SRR2062072           | NGBS809        | human       | Canada         | ST459     | IV              |
| SRR2062074           | NGBS813        | human       | Canada         | ST459     | IV              |
| SRR2062075           | NGBS815        | human       | Canada         | ST459     | IV              |
| SRR2062076           | NGBS824        | human       | Canada         | ST711     | IV              |
| SRR2062077           | NGBS825        | human       | Canada         | ST459     | IV              |
| SRR2062079           | NGBS830        | human       | Canada         | ST459     | IV              |
| SRR2062080           | NGBS836        | human       | Canada         | ST459     | IV              |
| SRR2062081           | NGBS700e       | human       | Canada         | ST459     | IV              |
| SRR2062082           | NGBS855        | human       | Canada         | ST459     | IV              |
| SRR2062084           | NGBS860        | human       | Canada         | ST459     | IV              |
| SRR2062085           | NGBS877        | human       | Canada         | SLV459    | IV              |
| SRR2062086           | NGBS899        | human       | Canada         | SLV459    | IV              |
| SRR2062087           | NGBS904        | human       | Canada         | ST459     | IV              |
| SRR2062088           | NGBS933        | human       | Canada         | ST3       | IV              |
| SRR2062090           | NGBS956        | human       | Canada         | ST459     | IV              |
| SRR2062091           | NGBS960        | human       | Canada         | ST3       | IV              |
| SRR2062092           | NGBS964        | human       | Canada         | ST459     | IV              |
| SRR2062093           | NGBS965        | human       | Canada         | ST459     | IV              |
| SRR2062094           | NGBS702        | human       | Canada         | ST459     | IV              |
| SRR2062097           | NGBS977f       | human       | Canada         | SLV459    | IV              |
| SRR2062099           | NGBS979        | human       | Canada         | ST459     | IV              |
| SRR2062100           | NGBS984        | human       | Canada         | ST459     | IV              |
| SRR2062101           | NGBS991        | human       | Canada         | ST196     | IV              |
| SRR2062103           | NGBS996        | human       | Canada         | ST459     | IV              |
| SRR2062104           | NGBS1006       | human       | Canada         | ST459     | IV              |
| SRR2062105           | NGBS1009       | human       | Canada         | ST459     | IV              |
| SRR2062107           | NGBS1017       | human       | Canada         | ST459     | IV              |
| SRR2062109           | NGBS706        | human       | Canada         | ST459     | IV              |
| SRR2062110           | NGBS1021       | human       | Canada         | ST459     | IV              |
| SRR2062112           | NGBS1024       | human       | Canada         | ST459     | IV              |
| SRR2062125           | NGBS727        | human       | Canada         | SLV452    | IV              |
| SRR2062139           | NGBS736        | human       | Canada         | ST459     | IV              |
| SRR2062154           | NGBS737        | human       | Canada         | ST459     | IV              |
| SRR2062160           | NGBS741        | human       | Canada         | ST459     | IV              |
| SRR2068019           | NGBS1041       | human       | Canada         | ST459     | IV              |

Table S2 continued from previous page

| ACCESSION/RUN | ISOLATE   | HOST  | COUNTRY | ST     | SEROTYPE |
|---------------|-----------|-------|---------|--------|----------|
| SRR2068021    | NGBS1043  | human | Canada  | ST459  | IV       |
| SRR2068022    | NGBS1045  | human | Canada  | ST459  | IV       |
| SRR2068023    | NGBS1046  | human | Canada  | ST459  | IV       |
| SRR2068024    | NGBS1047  | human | Canada  | ST459  | IV       |
| SRR2068025    | NGBS1048  | human | Canada  | ST459  | IV       |
| SRR2068026    | NGBS1049  | human | Canada  | ST459  | IV       |
| SRR2068027    | NGBS1050  | human | Canada  | ST452  | IV       |
| SRR2068028    | NGBS1051  | human | Canada  | ST459  | IV       |
| SRR2068029    | NGBS1052  | human | Canada  | ST459  | IV       |
| SRR2068031    | NGBS1054  | human | Canada  | ST459  | IV       |
| SRR2068032    | NGBS1056  | human | Canada  | ST459  | IV       |
| SRR2068033    | NGBS1058  | human | Canada  | ST459  | IV       |
| SRR2068034    | NGBS1059  | human | Canada  | ST459  | IV       |
| SRR2068035    | NGBS1061  | human | Canada  | ST459  | IV       |
| SRR2068036    | NGBS1062  | human | Canada  | ST459  | IV       |
| SRR2068037    | NGBS1063  | human | Canada  | ST459  | IV       |
| SRR2068038    | NGBS1064  | human | Canada  | ST459  | IV       |
| SRR2068039    | NGBS1065  | human | Canada  | ST459  | IV       |
| SRR2068040    | NGBS1066  | human | Canada  | ST459  | IV       |
| SRR2068041    | NGBS1067  | human | Canada  | ST459  | IV       |
| SRR2068042    | NGBS1068  | human | Canada  | ST459  | IV       |
| SRR2068043    | NGBS1071g | human | Canada  | ST459  | IV       |
| SRR2068044    | NGBS1072g | human | Canada  | ST459  | IV       |
| SRR2068045    | NGBS1074  | human | Canada  | ST459  | IV       |
| SRR2068046    | NGBS1075  | human | Canada  | ST459  | IV       |
| SRR2068047    | NGBS1079  | human | Canada  | ST452  | IV       |
| SRR2068048    | NGBS1080  | human | Canada  | SLV459 | IV       |
| SRR2068049    | NGBS1082  | human | Canada  | ST459  | IV       |
| SRR2068050    | NGBS1083  | human | Canada  | ST459  | IV       |
| SRR2451885    | NGBS129   | human | Canada  | ST31   | III      |
| SRR2451888    | NGBS147   | human | Canada  | ST17   | III      |
| SRR2451889    | NGBS149   | human | Canada  | ST17   | III      |
| SRR2451892    | NGBS169   | human | Canada  | ST17   | III      |
| SRR2451894    | NGBS205   | human | Canada  | ST17   | III      |
| SRR2451896    | NGBS222   | human | Canada  | ST17   | III      |
| SRR2451897    | NGBS238   | human | Canada  | ST17   | III      |
| SRR2451898    | NGBS239   | human | Canada  | ST17   | III      |
| SRR2451901    | NGBS277   | human | Canada  | ST17   | III      |
| SRR2451902    | NGBS282   | human | Canada  | ST17   | III      |
| SRR2451904    | NGBS296   | human | Canada  | ST17   | III      |
| SRR2451905    | NGBS297   | human | Canada  | ST17   | III      |
| SRR2451906    | NGBS299   | human | Canada  | ST17   | III      |
| SRR2451907    | NGBS306   | human | Canada  | ST17   | III      |

Table S2 continued from previous page

| <b>ACCESSION/RUN</b> | <b>ISOLATE</b> | <b>HOST</b> | <b>COUNTRY</b> | <b>ST</b> | <b>SEROTYPE</b> |
|----------------------|----------------|-------------|----------------|-----------|-----------------|
| SRR2451908           | NGBS312        | human       | Canada         | ST17      | III             |
| SRR2451909           | NGBS317        | human       | Canada         | ST17      | III             |
| SRR2451910           | NGBS318        | human       | Canada         | ST290     | III             |
| SRR2451914           | NGBS356        | human       | Canada         | ST17      | III             |
| SRR2451915           | NGBS361        | human       | Canada         | ST17      | III             |
| SRR2451916           | NGBS362        | human       | Canada         | ST17      | III             |
| SRR2451917           | NGBS368        | human       | Canada         | ST17      | III             |
| SRR2451919           | NGBS374        | human       | Canada         | ST17      | III             |
| SRR2451922           | NGBS398        | human       | Canada         | ST17      | III             |
| SRR2451923           | NGBS403        | human       | Canada         | ST17      | III             |
| SRR2451925           | NGBS421        | human       | Canada         | ST17      | III             |
| SRR2451926           | NGBS422        | human       | Canada         | ST17      | III             |
| SRR2451929           | NGBS456        | human       | Canada         | ST17      | III             |
| SRR2451930           | NGBS464        | human       | Canada         | ST17      | III             |
| SRR2451931           | NGBS469        | human       | Canada         | ST17      | III             |
| SRR2451932           | NGBS470        | human       | Canada         | ST17      | III             |
| SRR2451933           | NGBS483        | human       | Canada         | ST17      | III             |
| SRR2451934           | NGBS485        | human       | Canada         | ST17      | III             |
| SRR2451935           | NGBS486        | human       | Canada         | ST17      | III             |
| SRR2451936           | NGBS500        | human       | Canada         | ST17      | III             |
| SRR2451938           | NGBS502        | human       | Canada         | ST95      | III             |
| SRR2451939           | NGBS515        | human       | Canada         | ST17      | III             |
| SRR2451942           | NGBS534        | human       | Canada         | ST17      | III             |
| SRR2451943           | NGBS551        | human       | Canada         | ST17      | III             |
| SRR2451945           | NGBS583        | human       | Canada         | ST17      | III             |
| SRR2451946           | NGBS593        | human       | Canada         | ST17      | III             |
| SRR2451947           | NGBS594        | human       | Canada         | ST17      | III             |
| SRR2451948           | NGBS596        | human       | Canada         | ST17      | III             |
| SRR2451949           | NGBS607        | human       | Canada         | ST17      | III             |
| SRR2451950           | NGBS608        | human       | Canada         | ST17      | III             |
| SRR2451951           | NGBS609        | human       | Canada         | ST17      | III             |
| SRR2451952           | NGBS613        | human       | Canada         | ST17      | III             |
| SRR2451954           | NGBS618        | human       | Canada         | ST17      | III             |
| SRR2451955           | NGBS622        | human       | Canada         | ST148     | III             |
| SRR2451958           | NGBS632        | human       | Canada         | ST17      | III             |
| SRR2451960           | NGBS641        | human       | Canada         | ST17      | III             |
| SRR2451961           | NGBS644        | human       | Canada         | ST17      | III             |
| SRR2451962           | NGBS650        | human       | Canada         | ST17      | III             |
| SRR2981533           | SGBS103        | human       | USA            | ST1       | V               |
| SRR2981534           | SGBS104        | human       | USA            | ST1       | V               |
| SRR2981535           | SGBS105        | human       | USA            | SLV1      | V               |
| SRR2981536           | SGBS106        | human       | USA            | ST1       | V               |
| SRR2981541           | SGBS111        | human       | USA            | ST1       | V               |

Table S2 continued from previous page

| ACCESSION/RUN | ISOLATE | HOST  | COUNTRY | ST   | SEROTYPE |
|---------------|---------|-------|---------|------|----------|
| SRR2981542    | SGBS114 | human | USA     | ST1  | V        |
| SRR2981543    | SGBS115 | human | USA     | ST1  | V        |
| SRR2981545    | SGBS118 | human | USA     | ST1  | V        |
| SRR2981546    | SGBS119 | human | USA     | ST1  | V        |
| SRR2981547    | SGBS120 | human | USA     | ST1  | V        |
| SRR2981548    | SGBS122 | human | USA     | ST1  | V        |
| SRR2981550    | SGBS126 | human | USA     | ST1  | V        |
| SRR2981554    | SGBS133 | human | USA     | ST1  | V        |
| SRR2981555    | SGBS135 | human | USA     | ST1  | V        |
| SRR2981558    | SGBS140 | human | USA     | ST1  | V        |
| SRR2981559    | SGBS141 | human | USA     | ST1  | V        |
| SRR2981560    | SGBS143 | human | USA     | ST1  | V        |
| SRR2981561    | SGBS144 | human | USA     | ST1  | V        |
| SRR2981562    | SGBS145 | human | USA     | ST1  | V        |
| SRR2981563    | SGBS146 | human | USA     | ST1  | V        |
| SRR2981564    | SGBS147 | human | USA     | ST1  | V        |
| SRR2981565    | SGBS148 | human | USA     | ST1  | V        |
| SRR2981566    | SGBS150 | human | USA     | ST1  | V        |
| SRR2981568    | SGBS152 | human | USA     | ST1  | V        |
| SRR2981569    | SGBS031 | human | USA     | ST1  | V        |
| SRR2981570    | SGBS032 | human | USA     | ST1  | V        |
| SRR2981571    | SGBS033 | human | USA     | ST1  | V        |
| SRR2981572    | SGBS034 | human | USA     | ST1  | V        |
| SRR2981573    | SGBS035 | human | USA     | ST1  | V        |
| SRR2981574    | SGBS036 | human | USA     | ST1  | V        |
| SRR2981575    | SGBS037 | human | USA     | ST1  | V        |
| SRR2981576    | SGBS038 | human | USA     | ST1  | V        |
| SRR2981577    | SGBS039 | human | USA     | ST1  | V        |
| SRR2981578    | SGBS040 | human | USA     | ST1  | V        |
| SRR2981579    | SGBS041 | human | USA     | ST1  | V        |
| SRR2981580    | SGBS042 | human | USA     | ST1  | V        |
| SRR2981582    | SGBS044 | human | USA     | ST1  | V        |
| SRR2981583    | SGBS045 | human | USA     | ST1  | V        |
| SRR2981584    | SGBS046 | human | USA     | ST1  | V        |
| SRR2981585    | SGBS047 | human | USA     | ST1  | V        |
| SRR2981586    | SGBS048 | human | USA     | ST1  | V        |
| SRR2981587    | SGBS049 | human | USA     | SLV1 | V        |
| SRR2981589    | SGBS051 | human | USA     | ST1  | V        |
| SRR2981590    | SGBS052 | human | USA     | ST1  | V        |
| SRR2981591    | SGBS053 | human | USA     | ST1  | V        |
| SRR2981592    | SGBS054 | human | USA     | ST1  | V        |
| SRR2981593    | SGBS056 | human | USA     | ST1  | V        |
| SRR2981594    | SGBS057 | human | USA     | ST1  | V        |



Table S2 continued from previous page

| ACCESSION/RUN | ISOLATE      | HOST  | COUNTRY | ST    | SEROTYPE |
|---------------|--------------|-------|---------|-------|----------|
| SRR2981595    | SGBS058      | human | USA     | ST1   | V        |
| SRR2981597    | SGBS060      | human | USA     | ST1   | V        |
| SRR2981604    | SGBS067      | human | USA     | ST1   | V        |
| SRR2981606    | SGBS069      | human | USA     | ST1   | V        |
| SRR2981610    | SGBS074      | human | USA     | ST1   | V        |
| SRR2981611    | SGBS075      | human | USA     | ST1   | V        |
| SRR2981612    | SGBS076      | human | USA     | ST1   | V        |
| SRR2981613    | SGBS077      | human | USA     | ST1   | V        |
| SRR2981614    | SGBS078      | human | USA     | ST1   | V        |
| SRR2981615    | SGBS079      | human | USA     | ST153 | V        |
| SRR2981618    | SGBS082      | human | USA     | ST1   | V        |
| SRR2981620    | SGBS084      | human | USA     | ST1   | V        |
| SRR2981621    | SGBS085      | human | USA     | ST1   | V        |
| SRR2981623    | SGBS087      | human | USA     | ST1   | V        |
| SRR2981626    | SGBS092      | human | USA     | ST1   | V        |
| SRR2981628    | SGBS094      | human | USA     | ST1   | V        |
| SRR2981630    | SGBS096      | human | USA     | ST1   | V        |
| SRR2981632    | SGBS098      | human | USA     | ST1   | V        |
| SRR494266     | CCUG_24810   | human | Sweden  | ST19  | III      |
| SRR494270     | CCUG_37430   | human | Sweden  | ST19  | II       |
| SRR494271     | CCUG_29376   | human | Sweden  | ST12  | Ib       |
| SRR494272     | CCUG_30636   | human | Sweden  | ST1   | V        |
| SRR494276     | FSL_S3-137   | human | USA     | ST8   | Ib       |
| SRR494279     | FSL_S3-001   | human | USA     | ST1   | V        |
| SRR494280     | FSL_S3-003   | human | USA     | ST19  | III      |
| SRR494281     | CCUG_91      | human | Sweden  | ST28  | II       |
| SRR494284     | FSL_S3-102   | human | USA     | ST31  | III      |
| SRR494285     | FSL_F2-343   | human | USA     | ST88  | Ia       |
| SRR494286     | FSL_S3-014   | human | USA     | ST8   | Ib       |
| SRR494288     | FSL_S3-090   | human | USA     | ST23  | Ia       |
| SRR494289     | FSL_S3-023   | human | USA     | ST1   | V        |
| SRR494292     | LMG_15085    | human | USA     | ST17  | III      |
| SRR494295     | CCUG_49086   | human | Sweden  | ST17  | III      |
| SRR494296     | CCUG_49100   | human | Sweden  | ST1   | V        |
| SRR494297     | CCUG_44140   | human | Sweden  | ST1   | V        |
| SRR494298     | LMG_15081    | human | USA     | ST25  | Ia       |
| SRR494299     | LMG_15083    | human | USA     | ST7   | Ia       |
| SRR494300     | LMG_15084    | human | USA     | ST19  | II       |
| SRR494302     | CCUG_49072   | human | Sweden  | ST524 | V        |
| SRR494303     | CCUG_49087   | human | Sweden  | ST17  | III      |
| SRR494306     | CCUG_47293   | human | Sweden  | SLV9  | Ib       |
| SRR494309     | CCUG_44074   | human | Sweden  | ST23  | Ia       |
| SRR494311     | CCUG_39096_A | human | Sweden  | ST9   | Ib       |

Table S2 continued from previous page

| ACCESSION/RUN | ISOLATE    | HOST  | COUNTRY | ST     | SEROTYPE |
|---------------|------------|-------|---------|--------|----------|
| SRR494317     | CCUG_37739 | human | Sweden  | ST23   | Ia       |
| SRR494322     | BSU253     | human | Germany | ST23   | Ia       |
| SRR494323     | BSU247     | human | Germany | ST26   | V        |
| SRR494325     | BSU248     | human | Germany | ST12   | Ib       |
| SRR494327     | BSU252     | human | Germany | ST1    | V        |
| SRR494328     | BSU454     | human | Germany | ST8    | Ib       |
| SRR494330     | LMG_15094  | human | Belgium | ST17   | III      |
| SRR494331     | LMG_15095  | human | Belgium | ST17   | III      |
| SRR494332     | LMG_15090  | human | Belgium | ST8    | Ib       |
| SRR494336     | LMG_15091  | human | Belgium | SLV786 | IV       |
| SRR494339     | BSU451     | human | Germany | ST103  | Ia       |
| SRR494340     | BSU96      | human | Germany | ST17   | III      |
| SRR494341     | BSU165     | human | Germany | ST28   | II       |
| SRR494342     | BSU174     | human | Germany | ST41   | V        |
| SRR494343     | BSU92      | human | Germany | ST196  | IV       |
| SRR494344     | BSU133     | human | Germany | ST6    | Ib       |
| SRR494346     | BSU260     | human | Germany | ST88   | Ia       |
| SRR494355     | GB00202    | human | Canada  | ST10   | Ib       |
| SRR494358     | GB00097    | human | Canada  | ST17   | III      |
| SRR494359     | GB00111    | human | Canada  | ST32   | III      |
| SRR494360     | GB00115    | human | Canada  | ST17   | III      |
| SRR494361     | GB00190    | human | Canada  | ST23   | Ia       |
| SRR494364     | GB00083    | human | Canada  | ST1    | VI       |
| SRR494365     | GB00084    | human | Canada  | ST1    | VIII     |
| SRR494366     | GB00003    | human | Canada  | ST12   | Ib       |
| SRR494367     | GB00012    | human | Canada  | ST1    | V        |
| SRR494368     | GB00018    | human | Canada  | ST444  | Ia       |
| SRR494369     | GB00082    | human | Canada  | ST2    | IV       |
| SRR494370     | GB00013    | human | Canada  | ST1    | V        |
| SRR494371     | GB00020    | human | Canada  | ST1    | V        |
| SRR494372     | GB00002    | human | Canada  | ST23   | Ia       |
| SRR494374     | GB00864    | human | USA     | ST10   | II       |
| SRR494375     | GB00663    | human | Canada  | ST19   | III      |
| SRR494376     | GB00679    | human | Canada  | ST2    | II       |
| SRR494377     | GB00654    | human | Canada  | ST17   | III      |
| SRR494378     | GB00651    | human | Canada  | ST8    | Ib       |
| SRR494380     | GB00640    | human | Canada  | ST26   | V        |
| SRR494383     | GB00588    | human | Canada  | ST447  | II       |
| SRR494386     | GB00555    | human | Canada  | ST12   | Ib       |
| SRR494388     | GB00264    | human | Canada  | ST10   | II       |
| SRR494389     | GB00279    | human | Canada  | ST2    | II       |
| SRR494390     | GB00300    | human | Canada  | ST130  | IX       |
| SRR494392     | GB00241    | human | Canada  | ST1    | V        |

Table S2 continued from previous page

| <b>ACCESSION/RUN</b> | <b>ISOLATE</b> | <b>HOST</b> | <b>COUNTRY</b> | <b>ST</b> | <b>SEROTYPE</b> |
|----------------------|----------------|-------------|----------------|-----------|-----------------|
| SRR494393            | GB00226        | human       | Canada         | ST28      | II              |
| SRR494394            | GB00245        | human       | Canada         | ST23      | Ia              |
| SRR494395            | GB00247        | human       | Canada         | ST24      | Ia              |
| SRR494396            | GB00219        | human       | Canada         | ST8       | Ib              |
| SRR494568            | GB00932        | human       | USA            | ST23      | Ia              |
| SRR494611            | GB00887        | human       | USA            | ST23      | Ia              |
| SRR494612            | GB00888        | human       | USA            | ST41      | V               |
| SRR494631            | GB00914        | human       | USA            | ST8       | Ib              |
| SRR494632            | GB00922        | human       | USA            | ST88      | Ia              |
| SRR494635            | GB00911        | human       | USA            | ST452     | IV              |
| SRR494636            | GB00867        | human       | USA            | ST23      | Ia              |
| SRR494637            | GB00884        | human       | USA            | ST19      | III             |
| SRR494638            | GB00955        | human       | USA            | SLV1      | V               |
| SRR494645            | GB00924        | human       | USA            | ST1       | V               |
| SRR494656            | GB00933        | human       | USA            | ST452     | IV              |
| SRR494658            | GB00901        | human       | USA            | ST459     | IV              |
| SRR494659            | GB00909        | human       | USA            | ST12      | Ib              |
| SRR494660            | GB00874        | human       | USA            | ST1       | II              |
| SRR496544            | MRI_Z1-211     | bovine      | Italy          | ST1       | V               |
| SRR496556            | MRI_Z1-025     | bovine      | Denmark        | ST1       | V               |
| SRR496920            | MRI_Z1-199     | seal        | United Kingdom | ST23      | Ia              |
| SRR497007            | GB00893        | human       | USA            | ST8       | Ib              |
| SRR497011            | STIR-CD-14     | fish        | Vietnam        | ST491     | III             |
| SRR497118            | MRI_Z1-198     | dolphin     | United Kingdom | ST12      | Ib              |
| SRR525043            | GB00548        | human       | Canada         | ST88      | Ia              |
| SRR628712            | GB00999        | human       | USA            | ST1       | V               |
| SRR6996453           | QMA0323        | fish        | Australia      | ST261     | Ib              |

Table S3: Clonal complexes (CC) of the genomes included in dataset 2. Sequence types (ST) and single locus variants (SLV) identified and grouped among the different CC according to Richards et al. (2019) are shown.

| <b>CLONAL COMPLEX (CC)</b> | <b>SEQUENCE TYPES (ST)</b>               |
|----------------------------|------------------------------------------|
| <b>1</b>                   | 1, 2, 153, 196, 387, 459, 524, 682, 710  |
| <b>7</b>                   | 6, 7, 41                                 |
| <b>12</b>                  | 3, 8, 9, 10, 12, 255, 523, 604, 652, 711 |
| <b>17</b>                  | 17, 31, 32, 95, 148, 290, 315, 467       |
| <b>19</b>                  | 19, 28, 110, 335, 447, 479               |
| <b>22</b>                  | 22                                       |
| <b>23</b>                  | 23, 24, 25, 88, 144, 452                 |
| <b>26</b>                  | 26                                       |
| <b>67</b>                  | 67                                       |
| <b>103</b>                 | 103                                      |
| <b>130</b>                 | 130                                      |
| <b>260/261</b>             | 261, 257 (SLV)                           |
| <b>283</b>                 | 283, 491                                 |
| <b>609</b>                 | 609                                      |

**Table S4.** Prophage integrase family type identity and similarity table. Progressive numbers are assigned to sixteen integrase types, at twelve different integration sites. Numbers indicate query coverage and percentage of identity (QC/ID) based on BLASTp comparison of the amino acid sequences. Comparison was always run with the longest sequence as the database and the shortest sequence as the query. Phage integrase 1 was present at insertion site GBS1 and at GBS7 (1at7).

| PHAGE INTEGRASE | 1            | 2.1        | 2.2        | 3         | 4         | 5          | 6.1       | 6.2       | 1at7       | 8          | 9.1        | 9.2        | 10        | 11.1       | 11.2       | 11.3      | 12        |
|-----------------|--------------|------------|------------|-----------|-----------|------------|-----------|-----------|------------|------------|------------|------------|-----------|------------|------------|-----------|-----------|
| <b>1</b>        | 100/ 84/ 100 | 84/ 23.68  | 87/ 25.15  | 92/ 26.69 | 91/ 28.14 | 51/ 26.71  | 97/ 35.7  | 98/ 33.16 | 100/ 100   | 99/ 28.72  | 92/ 24.35  | 93/ 22.25  | 18/ 32.26 | 38/ 24.24  | 4/ 27.78   | 92/ 26.76 | 39/ 36.84 |
| <b>2.1</b>      | 84/ 23.68    | 100/ 100   | 100/ 71.35 | 49/ 28.10 | 45/ 24.04 | 67/ 21.61  | 94/ 26.86 | 96/ 27.73 | 84/ 23.68  | 80/ 28.99  | 99/ 59.32  | 99/ 58.92  | 17/ 50    | 25/ 40.74  | 34/ 25.58  | 78/ 24.23 | 90/ 25.14 |
| <b>2.2</b>      | 87/ 25.15    | 100/ 71.35 | 100/ 100   | 42/ 30.46 | 87/ 20.30 | 45/ 24.14  | 89/ 23.35 | 93/ 26.29 | 87/ 25.15  | 76/ 23.67  | 99/ 54.65  | 99/ 54.26  | 13/ 45.45 | 15/ 34.78  | 5/ 27.21   | 77/ 22.69 | 86/ 22.69 |
| <b>3</b>        | 92/ 26.69    | 49/ 28.10  | 42/ 30.46  | 100/ 100  | 95/ 31.75 | 58/ 23.70  | 94/ 29.84 | 89/ 26.11 | 92/ 26.69  | 97/ 34.75  | 78/ 26.48  | 81/ 23.97  | 29/ 26.80 | 21/ 28.26  | 17/ 26.32  | 98/ 50.83 | 90/ 19.83 |
| <b>4</b>        | 91/ 28.14    | 45/ 24.04  | 87/ 20.30  | 95/ 31.75 | 100/ 100  | 91/ 19.49  | 80/ 27.30 | 93/ 28.12 | 91/ 28.14  | 97/ 34.04  | 39/ 22.70  | 85/ 22.09  | 17/ 32.56 | 31/ 35.29  | 0/ 32.55   | 97/ 24.07 | 39/ 24.07 |
| <b>5</b>        | 51/ 26.71    | 67/ 21.61  | 45/ 24.14  | 58/ 23.70 | 91/ 19.49 | 100/ 26.71 | 59/ 30.16 | 72/ 24.31 | 51/ 26.71  | 77/ 23.08  | 46/ 25.77  | 74/ 19.76  | 15/ 50.00 | 53/ 30.00  | 20/ 25.93  | 72/ 24.70 | 22/ 42.86 |
| <b>6.1</b>      | 97/ 35.7     | 94/ 26.86  | 89/ 23.35  | 94/ 29.84 | 80/ 27.30 | 59/ 30.16  | 100/ 100  | 98/ 58.06 | 97/ 35.7   | 81/ 28.16  | 94/ 27.20  | 93/ 26.15  | 17/ 47.06 | 45/ 33.33  | 30/ 17.74  | 90/ 29.18 | 90/ 22.75 |
| <b>6.2</b>      | 98/ 33.16    | 96/ 27.73  | 93/ 26.29  | 89/ 26.11 | 93/ 28.12 | 72/ 24.31  | 98/ 58.06 | 100/ 100  | 98/ 33.16  | 82/ 27.85  | 97/ 27.12  | 96/ 26.57  | 43/ 29.82 | 11/ 50.00  | 30/ 32.43  | 95/ 28.61 | 91/ 23.99 |
| <b>1at7</b>     | 100/ 33.16   | 84/ 27.73  | 87/ 26.29  | 92/ 26.11 | 91/ 28.12 | 51/ 24.31  | 97/ 58.06 | 98/ 100   | 100/ 33.16 | 99/ 27.85  | 92/ 27.12  | 93/ 26.57  | 18/ 28.72 | 38/ 24.24  | 4/ 27.78   | 92/ 26.76 | 39/ 36.84 |
| <b>8</b>        | 99/ 28.72    | 80/ 23.68  | 76/ 25.15  | 97/ 26.69 | 97/ 28.14 | 77/ 26.71  | 81/ 35.7  | 82/ 33.16 | 99/ 28.72  | 100/ 28.72 | 83/ 24.35  | 93/ 22.25  | 36/ 32.26 | 34/ 24.24  | 3/ 27.78   | 96/ 26.76 | 72/ 36.84 |
| <b>9.1</b>      | 92/ 24.35    | 99/ 59.32  | 99/ 54.65  | 99/ 26.48 | 39/ 22.70 | 46/ 25.77  | 94/ 27.20 | 97/ 27.12 | 92/ 24.35  | 83/ 23.30  | 100/ 83.71 | 100/ 83.71 | 13/ 38.46 | 20/ 45.16  | 16/ 25.00  | 78/ 23.45 | 84/ 23.19 |
| <b>9.2</b>      | 93/ 22.25    | 99/ 58.92  | 99/ 54.26  | 81/ 23.97 | 85/ 22.09 | 74/ 19.76  | 93/ 26.15 | 96/ 26.57 | 93/ 22.25  | 93/ 23.03  | 100/ 83.71 | 100/ 83.71 | 12/ 39.13 | 19/ 40.74  | 18/ 25.00  | 90/ 24.49 | 85/ 22.75 |
| <b>10</b>       | 18/ 32.26    | 17/ 50     | 13/ 45.45  | 29/ 26.80 | 17/ 32.56 | 15/ 50.00  | 17/ 47.06 | 43/ 29.82 | 18/ 32.26  | 36/ 36.84  | 13/ 38.46  | 12/ 39.13  | 100/ 100  | 99/ 44.54  | 98/ 47.16  | 37/ 36.84 | 32/ 30.95 |
| <b>11.1</b>     | 38/ 24.24    | 25/ 40.74  | 15/ 34.78  | 21/ 28.26 | 31/ 35.29 | 53/ 30.00  | 45/ 33.33 | 11/ 50.00 | 38/ 24.24  | 34/ 35.14  | 20/ 45.16  | 19/ 40.74  | 99/ 44.54 | 100/ 57.92 | 99/ 27.27  | 16/ 23.08 | 28/ 23.08 |
| <b>11.2</b>     | 4/ 27.78     | 34/ 25.58  | 5/ 57.14   | 17/ 26.32 | 0/ 25.93  | 20/ 17.74  | 30/ 17.74 | 30/ 32.43 | 4/ 27.78   | 3/ 36.84   | 16/ 25.00  | 18/ 25.00  | 98/ 47.16 | 99/ 57.92  | 100/ 42.86 | 7/ 54.55  | 2/ 54.55  |
| <b>11.3</b>     | 92/ 26.76    | 78/ 24.23  | 77/ 27.21  | 98/ 50.83 | 97/ 32.55 | 72/ 24.70  | 90/ 29.18 | 95/ 28.61 | 92/ 26.76  | 96/ 36.54  | 78/ 23.45  | 90/ 24.49  | 37/ 36.84 | 16/ 27.27  | 7/ 42.86   | 100/ 100  | 7/ 25.93  |
| <b>12</b>       | 39/ 36.84    | 90/ 25.14  | 86/ 22.69  | 90/ 19.83 | 39/ 24.07 | 22/ 42.86  | 90/ 22.75 | 91/ 23.99 | 39/ 36.84  | 72/ 23.10  | 84/ 23.19  | 85/ 22.75  | 32/ 30.95 | 28/ 23.08  | 2/ 54.55   | 7/ 25.93  | 100/ 100  |

**Table S5.** Distribution of complete prophages among major clonal complexes (CC) in dataset 2.

| <b>CLONAL COMPLEX (total number of genomes)</b> | <b>NUMBER OF PROPHAGES</b> |
|-------------------------------------------------|----------------------------|
| 1 (260)                                         | 136                        |
| 7 (7)                                           | 5                          |
| 12 (38)                                         | 31                         |
| 17 (90)                                         | 44                         |
| 19 (29)                                         | 23                         |
| 22 (3)                                          | 0                          |
| 23 (56)                                         | 30                         |
| 26 (4)                                          | 3                          |
| 67 (1)                                          | 0                          |
| 103 (2)                                         | 1                          |
| 130 (2)                                         | 0                          |
| 260/261 (2)                                     | 1                          |
| 283 (5)                                         | 5                          |
| 609 (1)                                         | 1                          |

**Table S6.** Distribution of complete prophages classified based on their integrase types among major sequence types (ST) in dataset 2.

| <b>PROPHAGE<br/>INTEGRASE</b> | <b>SEQUENCE TYPE (total number of isolates)</b> |                  |                  |                  |                   |
|-------------------------------|-------------------------------------------------|------------------|------------------|------------------|-------------------|
|                               | <b>ST1 (147)</b>                                | <b>ST17 (77)</b> | <b>ST19 (16)</b> | <b>ST23 (28)</b> | <b>ST459 (85)</b> |
| <i>GBSInt1</i>                | -                                               | 6                | -                | -                | -                 |
| <i>GBSInt2.1</i>              | -                                               | -                | -                | -                | 1                 |
| <i>GBSInt2.2</i>              | -                                               | -                | 1                | -                | 52                |
| <i>GBSInt3</i>                | 20                                              | -                | 7                | 6                | 13                |
| <i>GBSInt4</i>                | -                                               | 9                | 2                | -                | 1                 |
| <i>GBSInt6.1</i>              | -                                               | -                | 1                | -                | -                 |
| <i>GBSInt6.2</i>              | 1                                               | -                | 1                | 1                | -                 |
| <i>GBSInt8</i>                | 1                                               | 4                | -                | -                | -                 |
| <i>GBSInt9.1</i>              | -                                               | 1                | -                | -                | -                 |
| <i>GBSInt9.2</i>              | -                                               | 7                | -                | -                | 2                 |
| <i>GBSInt10</i>               | -                                               | 2                | -                | -                | -                 |
| <i>GBSInt11.1</i>             | -                                               | 1                | 2                | 1                | 13                |
| <i>GBSInt11.2</i>             | 8                                               | 4                | 1                | 3                | 10                |
| <i>GBSInt12</i>               | -                                               | -                | 2                | -                | -                 |

**Table S7.** Distribution of complete prophages among group B *Streptococcus* genomes from different continents in dataset 2.

| <b>CONTINENT (total number of genomes)</b> | <b>NUMBER OF PROPHAGES</b> |
|--------------------------------------------|----------------------------|
| Africa (1)                                 | 1                          |
| Asia (10)                                  | 5                          |
| Europe (117)                               | 68                         |
| North America (351)                        | 195                        |
| Oceania (18)                               | 9                          |
| South America (2)                          | 0                          |
| Unknown (4)                                | 2                          |

## 2.1 Figures

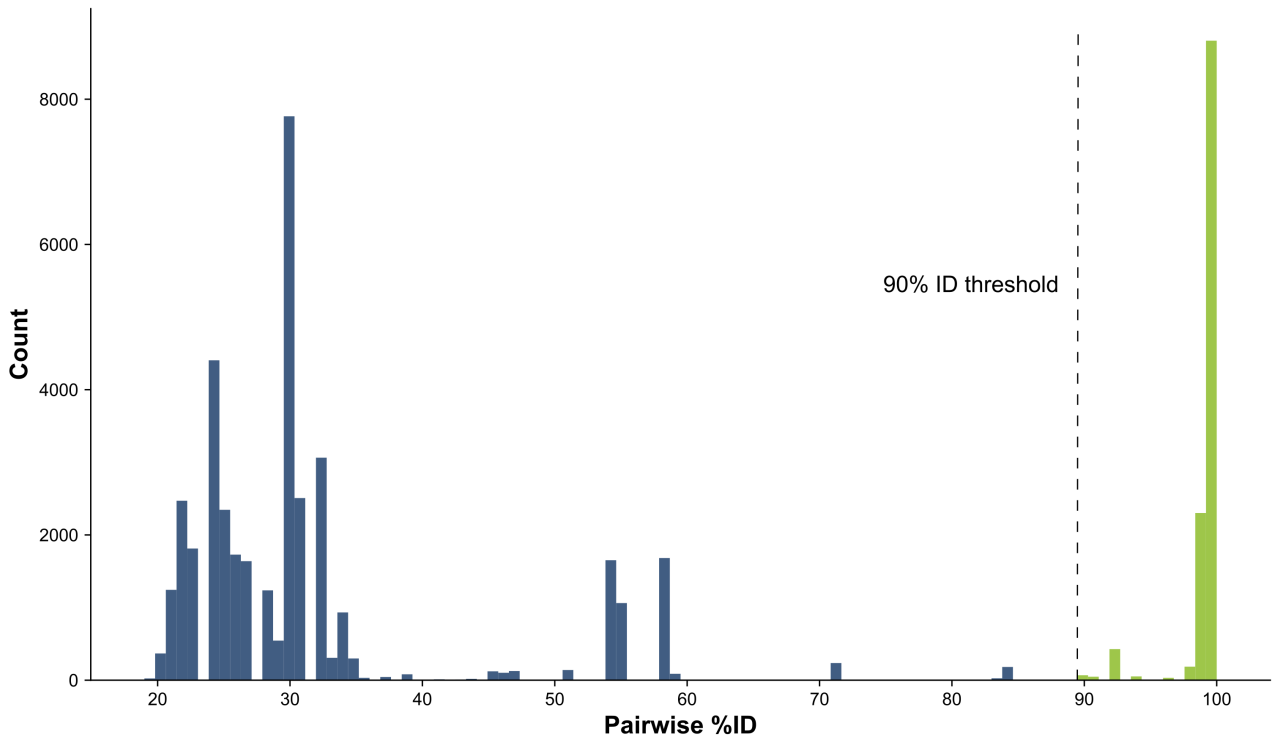

**Figure S1.** Histogram plot showing the distribution of the BLASTp percentage of identity (%ID) scores between all pairs of group B *Streptococcus* prophage integrase amino acid sequences identified in this study. Green bars represent %ID of matching integrase type pairs, blue bars show %ID of unmatched pairs. A minimum threshold of 90%ID BLASTp score (dashed line) was adopted to consider two integrase protein sequences as the same.



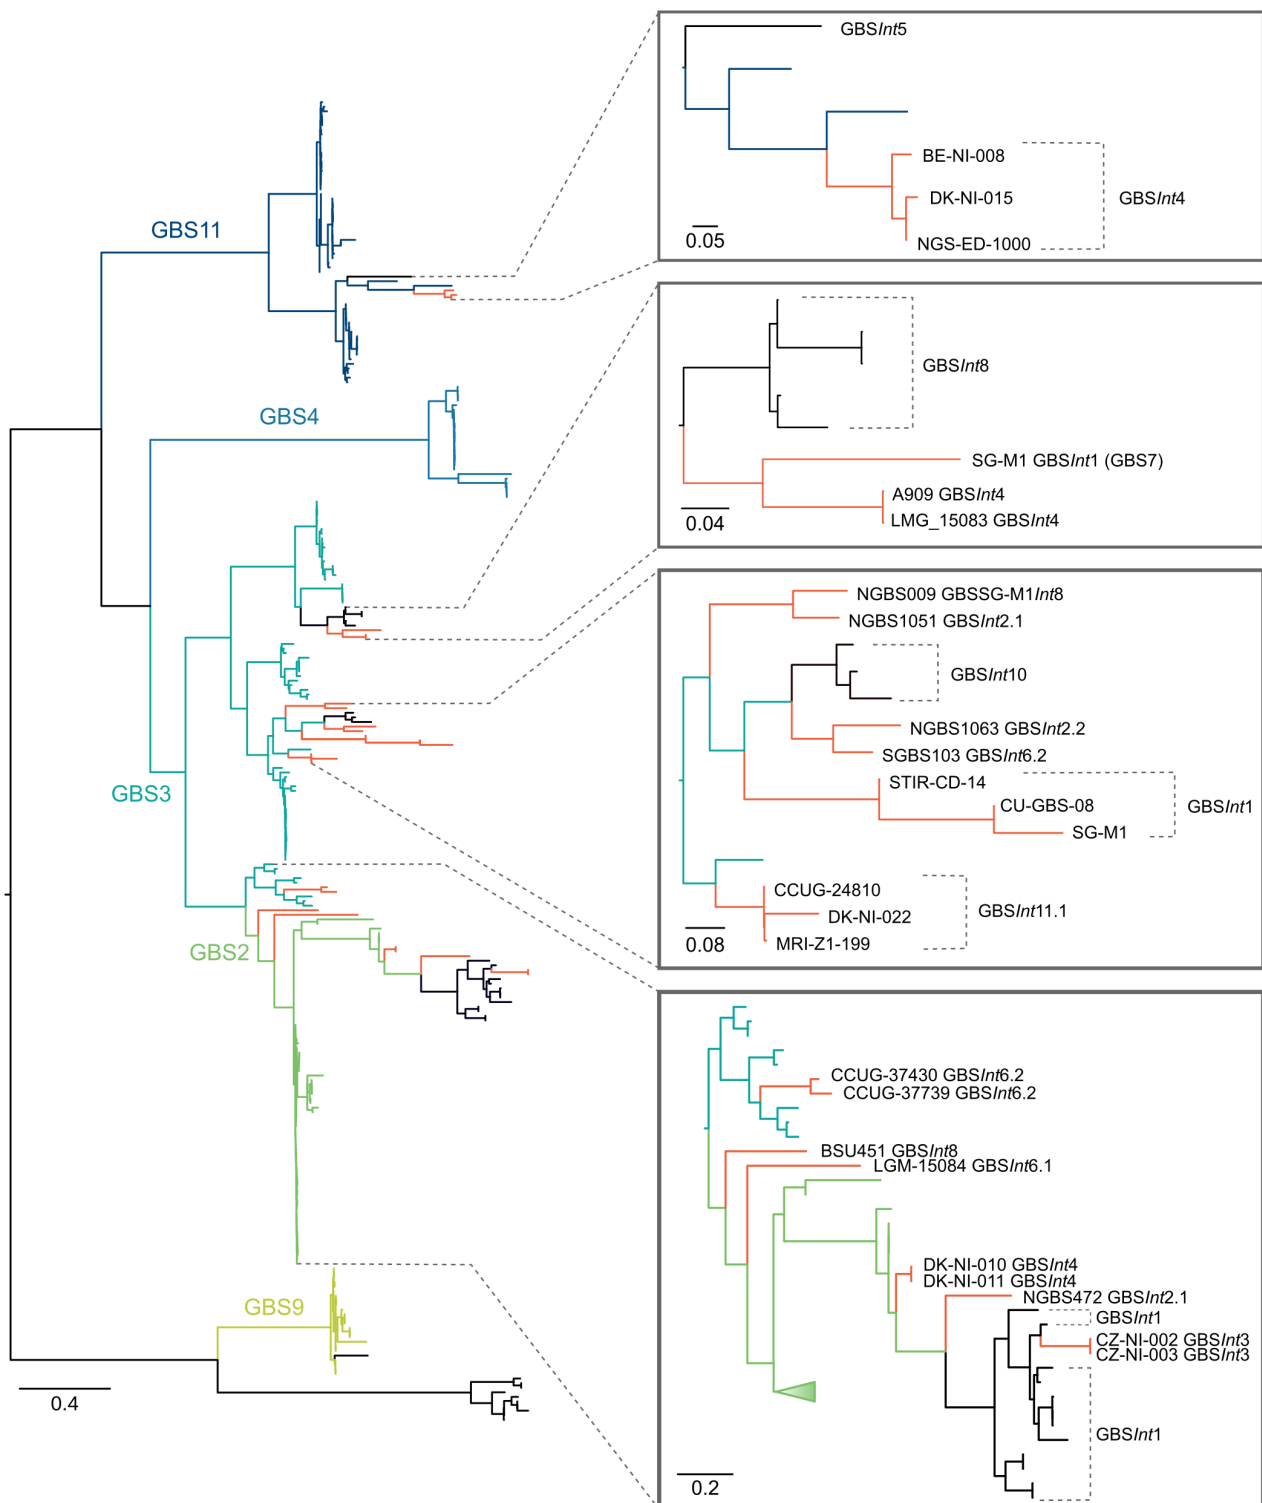

**Figure S2.** Approximate-maximum-likelihood phylogenetic tree of 266 complete prophages from group B *Streptococcus* (GBS) identified in dataset 2 and 22 prophages from van der Mee-Marquet et al. (2018). Phage clusters that are concordant with a particular insertion site and its integrase type/subtypes have been indicated (GBS2: green; GBS3: turquoise; GBS4: blue; GBS9: yellow; GBS11: navy). Red branches correspond to prophages that cluster within a group of phages with a different insertion site. Magnifications of such exceptions are shown and the integrase type has been indicated. Black branches correspond to minor clusters (GBS1, GBS5, GBS8, GBS10, GBS12) that are embedded in larger ones.

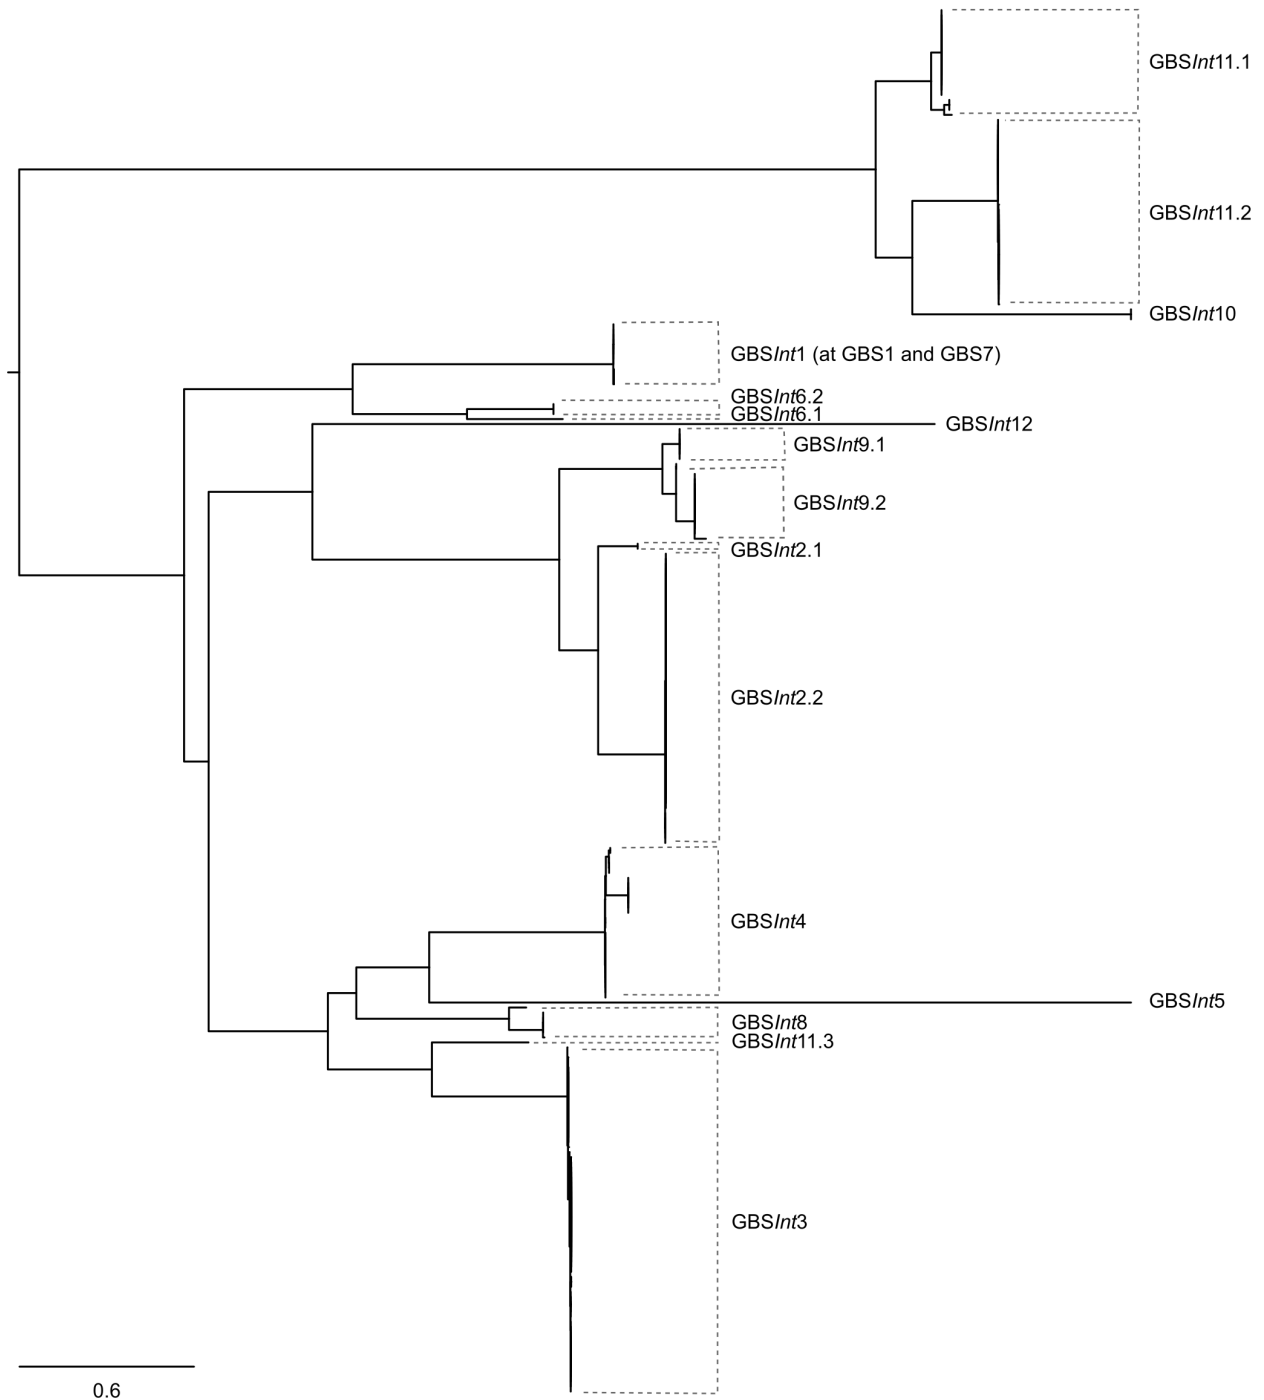

**Figure S3.** Approximately-maximum-likelihood phylogenetic tree of 266 phage integrase protein sequences identified in group B *Streptococcus* (GBS) in dataset 2. Integrases of the same type largely clustered within their assigned group, with the exception of GBSInt11.3 which clustered separately from GBSInt11.1 and GBSInt11.2.

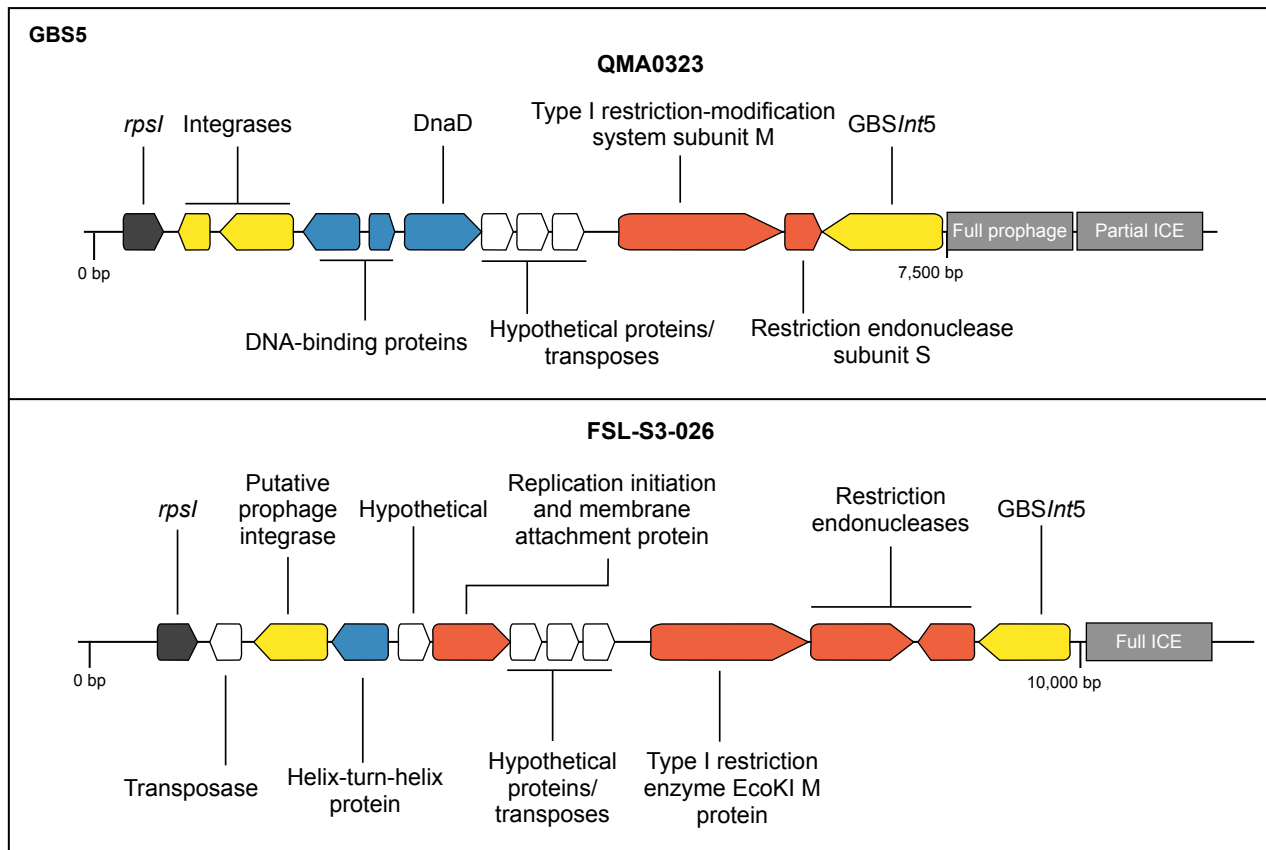

**Figure S4.** GBS5 insertion site as observed in group B *Streptococcus* (GBS) genome QMA0323, where *GBSInt5* is followed by a full prophage and by part of an integrative conjugative element (ICE), and in genome FSL\_S3-026, where the integrase was found as a singleton within a larger ICE. The gene *rpsI* is the closest upstream chromosomal gene to *GBSInt5*. The partial ICE after the prophage in QMA0323 showed similarity with part of the ICE in FSL\_S3-026 (~9,000bp, grey boxes at the right hand side). Genes are color-coded based on function (black: chromosomal genes; yellow: site-specific integrase; dark blue: transcriptional regulators; white: hypothetical; red: other genes).

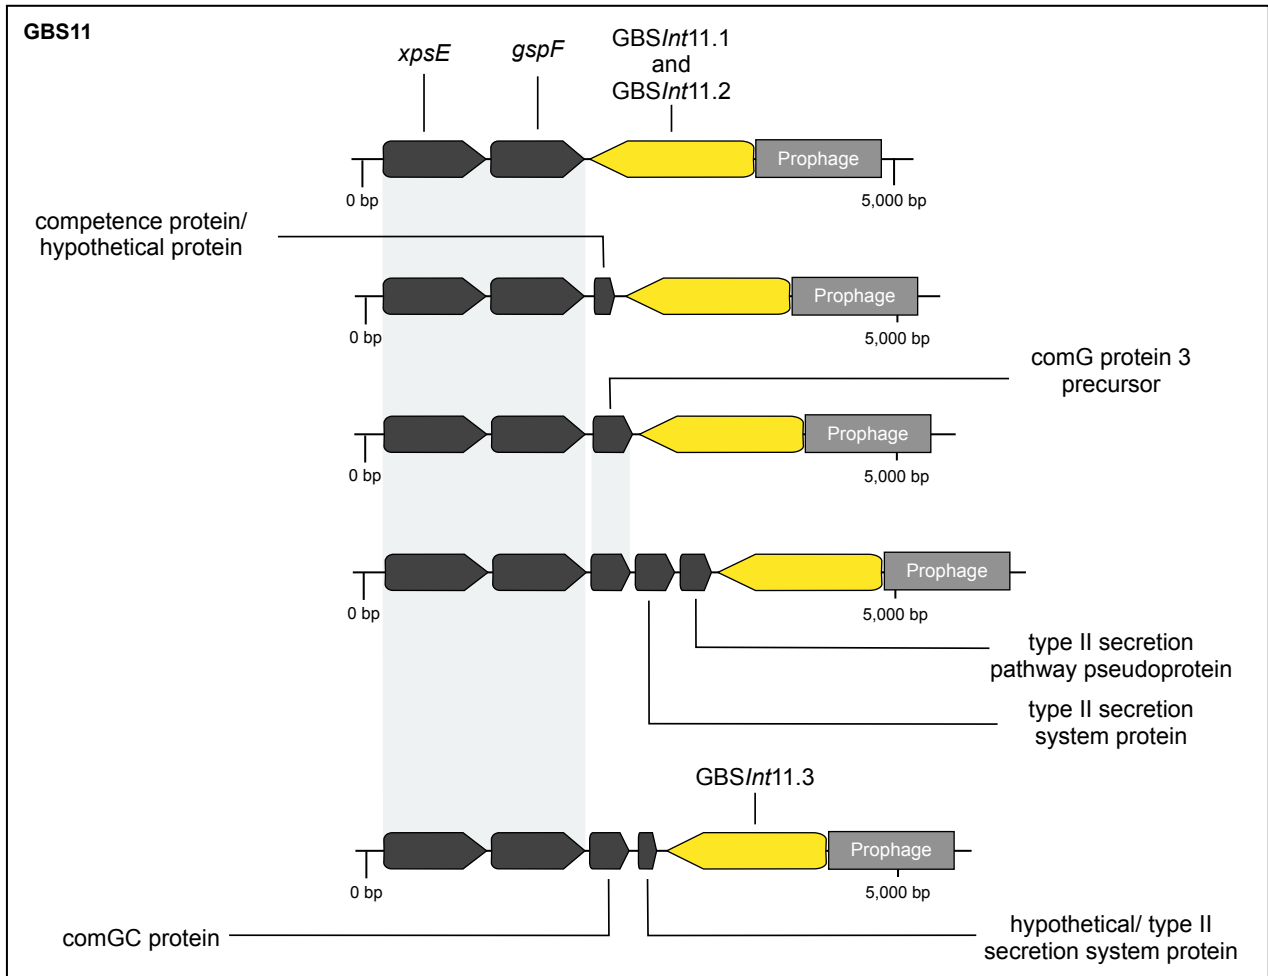

**Figure S5.** GBS11 insertion site variations in group B *Streptococcus* (GBS): *xpsE* and *gspF* genes are always present, and may be followed directly by GBSInt11.1 or GBSInt11.2 and the rest of the prophage. In other cases, additional small genes for competence and secretion systems were inserted between *gspF* and the prophage, regardless of integrase type, with GBSInt11.3 also found in this configuration. Genes are color-coded based on function (black: chromosomal genes; yellow: site-specific integrase).

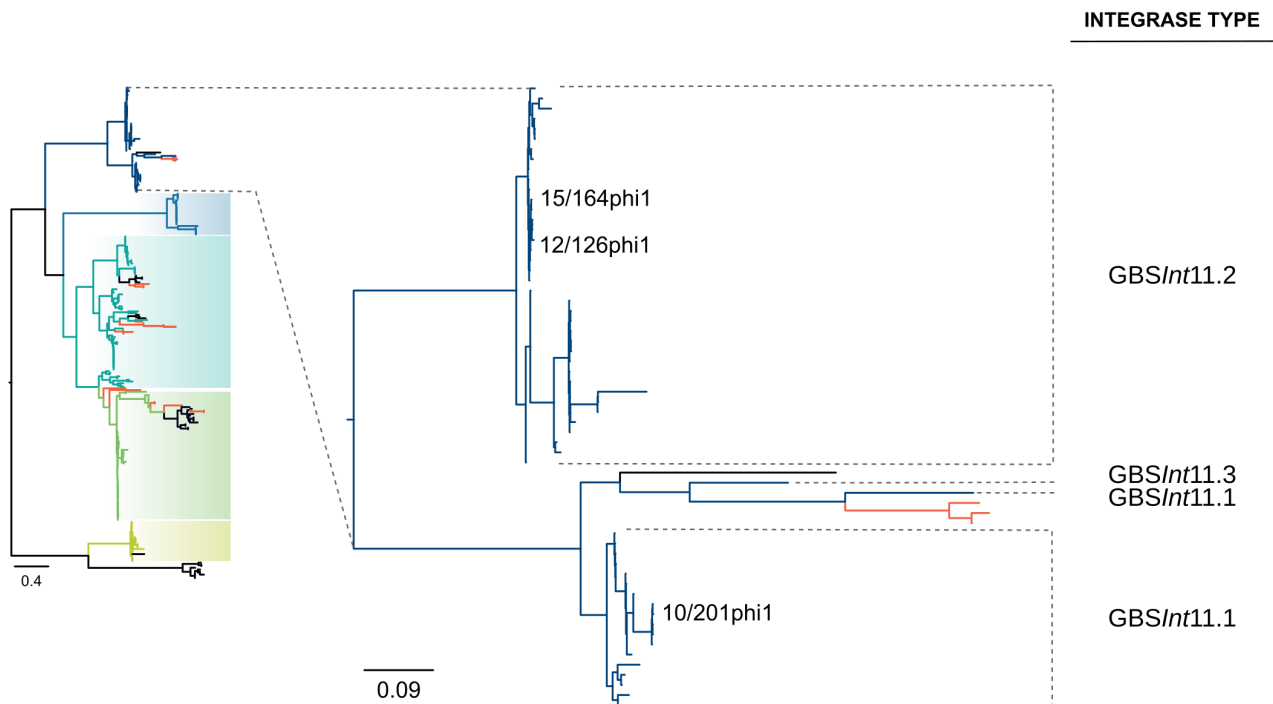

**Figure S6.** Magnification of the approximately-maximum-likelihood phylogenetic tree cluster of prophages with insertion site GBS11 (integrase types *GBSInt11.1*, *GBSInt11.2* and one example of *GBSInt11.3*). Prophages F1 (12/126phi1 and 15/164 phi1 in *GBSInt11.2*) and F2 (10/201phi1 in *GBSInt11.1*) from van der Mee-Marquet et al. (2018) have been indicated (blue branches: phages with either *GBSInt11.1*, *GBSInt11.2* or *GBSInt11.3*; black branch: prophage *GBSInt5*; red branches: prophages with *GBSInt4*).

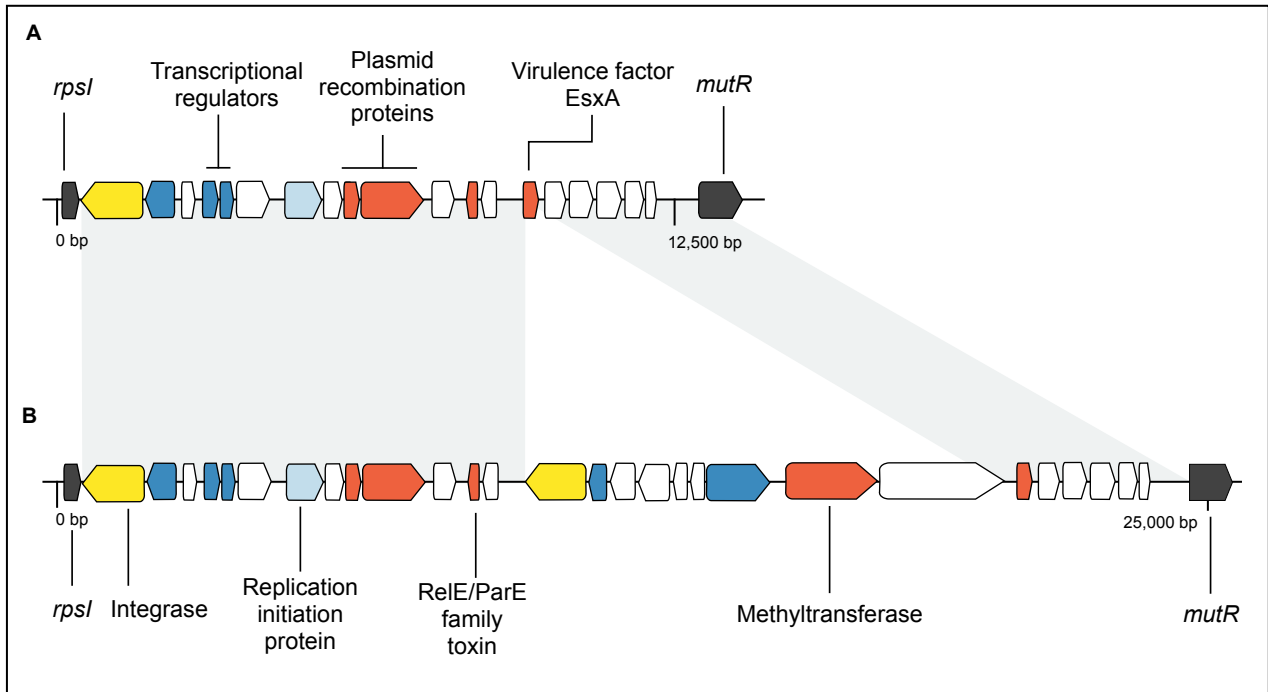

**Figure S7.** Example of a putative phage-inducible chromosomal island (PICI) mobile element (A) detected in the integration site *rpsI* (example genome: CU\_GBS\_98). This gene is described as a hotspot for recombination of mobile genetic elements (MGE): integrative conjugative elements (ICE) (Brochet al., 2008) and prophages (this work). The presence in this site of multiple site-specific integrase genes (B) is indicative of successive integration events (example genome: 09mas018883). Because of these multiple insertion events it was not possible to classify these elements with certainty, as they could have been fragments of other elements. Genes are color-coded based on function (black: chromosomal genes; yellow: site-specific integrase; dark blue: transcriptional regulators; light blue: replication genes; white: hypothetical; red: other genes).

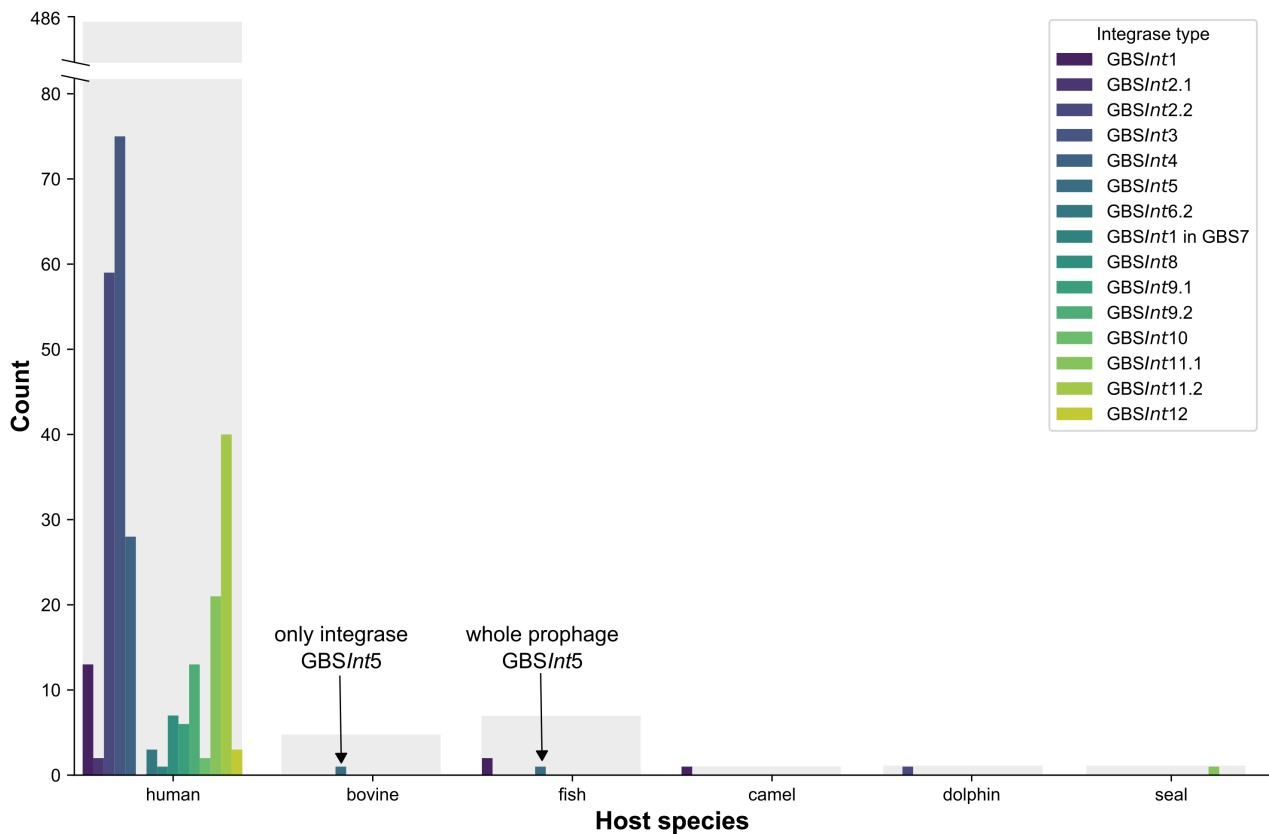

**Figure S8.** Distribution of complete prophages classified based on their integrase types (GBSInt1 to GBSInt12) in a publicly available Group B *Streptococcus* (GBS) dataset of 503 sequences comprising genomes from seven different host species and originating from different countries. Colored bars refer to complete prophages, with the exception of the bovine blue bar, which refers to integrase GBSInt5, as a singleton, i.e. not associated with a full prophage. Gray bars show the total number of isolates per host species. No prophage or integrase was detected in the single canine GBS genome included in the study.
